# Supplementary material for: Lifetime Risk from Obesity, and benefits of anti-obesity pharmacotherapy and global impact: A Multinational pooled analysis and modelling Study
Source: Research Square preprint supplement (doi:10.21203/rs.3.rs-7603884/v1), 2025-09-23
Supplement: Supplementary file 1 [file 1bc7c7c17377642f67e1ef9b.docx]

**Supplementary Appendix**

**Appendix Methods**

Appendix 1: Definitions of Prevalent Comorbidities

Appendix 2: Target population eligible for semaglutide therapy

Appendix 3: Assessment of CVD

Appendix 4: Description of the Cross-sectional Data Sources

Appendix 5: Statistical Methods for Lifetime Risk Estimation

Appendix 6: Methodology for Modeling Gains in Event-Free Survival

Appendix 7: Detailed Methodology for National-Level Projections

**Appendix Tables**

Table S1: Detailed Descriptions of Longitudinal Cohort Studies

Table S2: Data Sources and Sample Characteristics for National-Level Projections

Table S3: Remaining lifetime risk by age and BMI category for CVD event in all participants

Table S4: Age-specific mortality adjusted for 10-year, 20-year, 30-year CVD risk by BMI category and sex

Table S5: Estimated lifetime risk and Incidence rate by BMI category for CVD events in each cohort

Table S6: Semaglutide Eligibility Prevalence and Estimated Eligible Population in Adults Aged ≥50 Years, by Country

Table S7: Projected Cardiovascular Events Prevented with Semaglutide Treatment Among Adults Aged ≥50 Years, by Country

**Appendix Figures**

Figure S1: Selection of the lifetime risk study sample with index age 50 years

Figure S2: Selection of the semaglutide-eligible subgroup at index age 50 years

Figure S3: Selection for the National-Level Analysis

Figure S4: Selection of Participants for the Nationally Representative Analyses and Eligibility for Semaglutide Treatment

Figure S5: Estimated RMST Benefit Under Different Scenarios of Patient Compliance

Figure S6: Projected event-free survival gains for CVD by yearly change in efficacy of semaglutide treatment

Figure S7: Patient Compliance Amplifies the Impact of Treatment Effect Durability on Survival Benefit

**Appendix References**

**Appendix Methods**

**Appendix 1 Definitions of Prevalent Comorbidities**

1. **Ascertainment in ELSA, SHARE, HRS, CHARLS, and MHAS**

In the English Longitudinal Study of Ageing (ELSA), the Survey of Health, Ageing and Retirement in Europe (SHARE), the Health and Retirement Study (HRS), the China Health and Retirement Longitudinal Study (CHARLS), and the Mexican Health and Aging Study (MHAS), prevalent comorbidities such as hypertension, stroke, or dyslipidemia were ascertained on the basis of self-report. A participant was considered to have a specific condition if they either reported a physician diagnosis or reported current use of medication for that condition.

**2. Ascertainment in the MESA and ARIC Cohorts**

In the Multi-Ethnic Study of Atherosclerosis (MESA) and the Atherosclerosis Risk in Communities (ARIC) study, prevalent comorbidities were defined on the basis of a combination of self-reported physician diagnosis, clinical measurements, laboratory values, and medication use. The harmonized criteria used in the present analysis were as follows:

(1) prevalent hypertension was defined as a systolic blood pressure of 140 mmHg or higher, a diastolic blood pressure of 90 mmHg or higher, the current use of antihypertensive medication, or a self-reported history of a physician diagnosis of hypertension.

(2) prevalent diabetes was defined as a fasting plasma glucose level of 126 mg per deciliter or higher (to convert to millimoles per liter, multiply by 0.0555), the use of insulin or oral hypoglycemic agents, or a self-reported history of a physician diagnosis of diabetes.

(3) prevalent dyslipidemia was defined in both cohorts as the use of lipid-lowering medication.

**Appendix 2 Target population eligible for semaglutide therapy**

A target population eligible for semaglutide therapy was identified from the pooled individual participant data. The eligibility criteria were designed to align with the approved indications for semaglutide for chronic weight management, such as those from the U.S. Food and Drug Administration. Participants were included if they were 50 years of age or older, free of prevalent cardiovascular disease (CVD) at baseline, and met one of the following criteria:

1. Obesity: Body-mass index (BMI) ≥30.0 kg/m².
2. Overweight with Comorbidities: BMI ≥27.0 kg/m² and the presence of at least one weight-related comorbidity (hypertension, type 2 diabetes, or dyslipidemia).

Comorbidities were ascertained using a combination of self-reported physician diagnoses, objective measurements, and medication records at the baseline examination. (Detailed definitions are provided **in Appendix 1**).

**Appendix 3 Assessment of CVD**

1. **Assessment in ELSA, SHARE, HRS, CHARLS, and MHAS**

In these cohorts, incident cardiovascular disease events were ascertained primarily from self-reported physician diagnoses of heart disease or stroke, elicited through standardized questionnaires at each follow-up assessment. Participants were asked whether a physician had ever told them that they had heart disease (defined as angina, myocardial infarction, congestive heart failure, or other heart problems) or a stroke. For quality control, participants were asked to reconfirm their cardiovascular history at subsequent visits; previously reported events that were later denied by the participant were retrospectively adjudicated and corrected in the database. This method of event ascertainment is consistent with that of previous studies using these cohorts.

1. **Assessment in the MESA and ARIC Cohorts**

For the ARIC study, MESA, incident CVD was defined as a MI, stroke, CVD death. The adjudication process for events involved a panel to review hospitalization and death data per study protocols previously published. All events were adjudicated from medical records and death certificates for end-point classification and assignment of incidence dates by the morbidity and mortality classification/review committee in three studies.

**Appendix 4 Description of the cross-sectional studies**

**1. WHO STEPwise Approach to Surveillance (WHO-STEPS) Surveys**

For the national-level projections, we utilized publicly available, individual-level microdata from 68 nationally representative surveys conducted as part of the World Health Organization (WHO) STEPwise Approach to Surveillance (STEPS) framework. Detailed information for each included country-level survey is provided in **Appendix Table S2**. To ensure the contemporary relevance of our estimates, our analysis was restricted to the most recent survey wave available from each country, provided it was conducted in the year 2000 or later. A key strength of the STEPS framework is its standardized methodology for collecting questionnaire data, physical measurements (including height and weight), and biochemical markers, which promotes data comparability across diverse national settings.

All included surveys employed multi-stage cluster sampling designs and provided survey weights to allow for the generation of nationally representative estimates. Specifically, we applied the weights designed for the analysis of Step 2 (physical measurements) data. For the present study, the analysis was restricted to participants 50 years of age or older.

**2. Cross-Sectional Data from Harmonized Longitudinal Aging Studies**

In addition to the WHO-STEPS surveys, we utilized cross-sectional data from five nationally representative longitudinal studies on aging that are part of a harmonized network of "sister studies" modeled after the U.S. Health and Retirement Study (HRS). For the present analysis, we selected the most recent available survey wave from each cohort that included physical measurements for BMI calculation. The specific cohorts and survey years used were the Health and Retirement Study (2022), the China Health and Retirement Longitudinal Study (2015), the English Longitudinal Study of Ageing (2016), the Survey of Health, Ageing and Retirement in Europe (2019), and the Mexican Health and Aging Study (2018). Detailed descriptions of each of these cohort surveys are provided in **Appendix Table S2**.

To generate nationally representative estimates for BMI-related metrics, we applied the specific survey weights provided by each cohort for the subsample of participants who underwent physical measurements. For the present study, the analysis based on these data was restricted to participants 50 years of age or older.

**Appendix 5 Statistical Methods for Lifetime Risk Estimation**

We estimated the remaining lifetime risk of incident cardiovascular disease (CVD) using a non-parametric, competing-risks life-table method, consistent with the approach operationalized by the Practical Incidence Estimators (PIE) macro developed from the Framingham Heart Study1. This approach provides a discrete-time approximation of the Aalen-Johansen estimator for the cumulative incidence function2.

Using attained age as the time scale, we established risk sets for individuals free of CVD at index ages of 50, 60, 70, and 80 years, with follow-up extending to a terminal age of 95. The analysis was stratified according to the baseline body-mass index (BMI) category. Within each stratum, we constructed actuarial life tables using one-year age intervals. Incident CVD was defined as the event of interest, and death from non-CVD causes was treated as a competing event.

The cumulative incidence of CVD was estimated by summing the conditional probabilities of the event at each age interval, weighted by the cumulative probability of surviving free of either event (CVD or competing death) to the beginning of that interval. Censored observations were accounted for using a standard actuarial adjustment. Confidence intervals (95% CIs) were derived based on Greenwood’s formula. No covariate adjustments were made in this non-parametric estimation.

**Appendix 6 Detailed Methodology for Modeling the Potential Benefit of Semaglutide**

1. **Modeling Framework**

Our analysis was based on individual-level data pooled from seven prospective cohorts, representing a real-world primary prevention setting. Within this pooled dataset, we modeled the projected long-term cardiovascular benefit of semaglutide for the subgroup of participants who were eligible for pharmacologic weight management.

To estimate the gain in cardiovascular disease (CVD)–free survival, we modeled two survival trajectories for the subgroup of participants who were eligible for semaglutide therapy. First, we established the baseline (no-treatment) survival trajectory by directly analyzing the observed data from this subgroup within our pooled cohorts. Second, we projected a counterfactual “Pharmaceutical treatment” survival trajectory by applying the relative treatment effect (hazard ratio [HR], 0.80; 95% CI, 0.72 to 0.90) from the SELECT trial to the age-specific hazard rates derived from the baseline cohort. Because the projected gain in event-free survival depends on the age at treatment initiation, we calculated and compared these two survival trajectories for each year of age from 50 to 95. To accomplish this, we used a validated, nonparametric survival model with attained age as the time scale, rather than time from cohort entry3. The projected event-free survival for each trajectory was quantified as the area under its respective Kaplan-Meier curve (i.e., the restricted mean survival time). The difference in the area under the pharmaceutical treatment and no-treatment curves represented the projected gain in event-free years.

To quantify the uncertainty around these gains, we propagated the statistical uncertainty of the primary input parameter by repeating the entire projection using the upper (0.72) and lower (0.90) bounds of the 95% CI of the HR. The resulting age-specific estimates of survival gains and their 95% CIs were then smoothed for visualization using a locally weighted scatterplot smoothing (LOWESS) procedure.

1. **Derivation of the Counterfactual Pharmaceutical treatment Survival Curve**

The conversion of the hazard ratio (HR) from the SELECT trial into a projected gain in event-free survival is based on fundamental principles of survival analysis. The process involves three key steps to derive the counterfactual pharmaceutical treatment survival curve (S₁(t)) from the observed no-treatment survival curve (S₀(t)).

**Step 1: Estimation of the Baseline Hazard Rate**
First, we derived the baseline (no-treatment) age-specific hazard rate, h₀(t), from the observed survival curve, S₀(t). The hazard rate represents the instantaneous risk of a cardiovascular event at age t, given survival to that age. In a discrete-time approximation (e.g., using one-year age intervals), the hazard rate at age t can be estimated from the conditional probability of experiencing an event between age  and :

This provides a year-by-year risk profile for the untreated, semaglutide-eligible population based on the real-world data from our pooled cohorts.

**Step 2: Application of the Hazard Ratio to Derive the Pharmaceutical treatment Hazard Rate**

The core assumption of the model is that the treatment confers a constant proportional reduction in the hazard of a CVD event. The HR from the SELECT trial represents this relative effect. We applied this HR to the baseline hazard rate, h₀(t), to calculate the projected Pharmaceutical treatment hazard rate, h₁(t), for each age t:

**Step 3: Reconstruction of the Pharmaceutical treatment Survival Curve**

Finally, we reconstructed the counterfactual pharmaceutical treatment survival curve, S₁(t), from the newly derived Pharmaceutical treatment hazard rates, h₁(t). The survival function is mathematically related to the cumulative hazard function (the sum of all instantaneous hazards up to age t):

By leveraging the relationship that , this simplifies to the well-established formula used in primary analysis:

This final formula allows for a direct and computationally efficient transformation of the entire baseline survival curve into the projected pharmaceutical treatment survival curve. The gain in event-free years is then quantified by comparing the area under S₁(t) with the area under S₀(t).

1. **Probabilistic Sensitivity Analysis of Treatment Compliance and Effect Durability**

To evaluate the robustness of our findings to real-world uncertainties, we conducted a Monte Carlo simulation to explore the combined impact of imperfect treatment adherence and potential changes in long-term treatment effect durability on the projected gain in restricted mean survival time (RMST).

1. Simulation Framework

The simulation was based on a time-varying hazard ratio (HR) model applied to a baseline survival profile. The baseline (no-treatment) survival function, S₀(t), was derived non-parametrically from the semaglutide-eligible subgroup in our pooled cohorts, providing the empirical foundation for the age-specific baseline hazard rate, h₀(t).

1. Time-Varying Treatment Effect

To model potential waning or strengthening of the treatment effect over time, the HR at t years after treatment initiation was defined as:

where HR_initial was fixed at 0.80, and the annual_multiplier was a stochastic parameter. The Pharmaceutical treatment survival function for a fully adherent participant, S_treat(t), was then calculated numerically, with the HR(t) capped at 1.0 to ensure the treatment effect did not become harmful.

1. Parameterization of Uncertainty

Two key parameters were modeled as random variables in each simulation:

1. Treatment Effect Durability (annual_multiplier): To reflect a state of maximal ignorance regarding the long-term effect trajectory, this parameter was sampled from a Uniform distribution, U (0.90, 1.10). This range assumes that an annual change in the HR from a 10% strengthening (multiplier, 0.90) to a 10% weakening (multiplier, 1.10) is equally plausible.
2. Adherence (p): Modeled using a Beta distribution, a standard approach for proportions. The shape parameters (α, β) were determined by prespecified target adherence levels (from 10% to 90%) and a concentration parameter (set to 10 to represent substantial population heterogeneity).
3. Simulation Process and Outcome

A nested-loop simulation was performed. The outer loop iterated through the target adherence levels. For each level, an inner loop performed 5,000 Monte Carlo iterations. In each iteration, a value for the annual_multiplier and adherence () was sampled. The final simulated survival curve, , was computed as a weighted average reflecting partial adherence:

The outcome for each simulation was the gain in RMST (ΔRMST), calculated as the difference in the area under the and curves up to the age of 95.

1. **Key Assumptions of the Counterfactual Model**

The validity of our model's projections rests on several key, explicit assumptions:

1. **Transportability of the Hazard Ratio:** We assumed that the relative risk reduction (HR = 0.80) observed in the SELECT trial population is generalizable (transportable) to our primary prevention target population.
2. **Constant Proportional Hazards:** The model assumes that the relative treatment effect, as captured by the HR, remains constant across the entire follow-up period (from baseline to the terminal age of 95).
3. **Idealized Treatment Scenario:** The model implicitly assumes perfect adherence to and persistence with therapy throughout the simulation period. This represents an ideal "as-treated" scenario. Consequently, the projected benefits should be interpreted as the maximum potential gain under optimal conditions; real-world effectiveness may be attenuated by non-adherence.
4. **No Effect on Competing Risks:** For model parsimony, we assumed that semaglutide treatment does not independently alter the hazard of non-CVD death. Although pleiotropic effects of GLP-1 receptor agonists on non-CVD mortality have been hypothesized, robust evidence to precisely quantify this effect is limited. By treating non-CVD death as a censoring event in this specific analysis, the resulting RMST estimate is a direct measure of the gain in years lived free of CVD, conditional on survival from other causes.

**Appendix 7 Detailed Methodology for National-Level Projections**

To translate our individual-level findings into public health impact, we used cross-sectional data to project, at the national level, both the number of individuals eligible for semaglutide and the number of avertable CVD events.

**1. Data Sources**

The projection model required three key inputs for each country:

1. Population Demographics: Age-stratified national population counts for each year of age from 50 to 95 were obtained from the United Nations World Population Prospects (WPP-2024 version).
2. Prevalence of Eligibility for Semaglutide Therapy: Country-specific, age-specific prevalence of eligibility for semaglutide therapy was estimated from nationally representative health surveys.
3. Age-Specific Absolute Risk Reduction (ARR): The ARR attributable to semaglutide was derived directly from the survival functions estimated in our primary individual-level counterfactual analysis.

**2. Projection of Eligible Population Size and Avertable Events**

The projection for each country was conducted through the following sequential, age-stratified process:

**Step 1: Estimation of the Eligible Population:**

The estimation of the total eligible population involved a multi-step process to extrapolate from the survey sample to the national level.

First, using the individual-level data from each country's health survey, we calculated the prevalence of eligibility for semaglutide therapy for each single year of age (a) from 50 to 95. To account for the complex sampling designs and to ensure the estimates were nationally representative, we applied the specific survey weights designed for the subsample of participants who underwent physical measurements (anthropometry).

Next, to obtain the absolute number of eligible individuals at each age, N(a), these weighted prevalence estimates were post-calibrated to the corresponding national population counts from the United Nations World Population Prospects(wpp 2024 version). The total eligible population for the country was then calculated by summing N(a) across all age strata from 50 to 95.

**Step 2: Projection of Avertable Events:**

The total number of potentially avertable CVD events was calculated. For each age stratum a, the number of avertable events was calculated by multiplying the eligible population, N(a), by their corresponding age-specific absolute risk reduction, ARR(a):

The age-specific ARR is defined as the difference in the conditional probability of remaining CVD-free until age 95 between the Pharmaceutical treatment and no-treatment scenarios:

where S(t) represents the probability of remaining free of CVD at age t.

The total number of avertable events for the country was then estimated by summing these age-specific results across all strata from 50 to 95:

**Appendix Results**

**Table S1 Detailed Descriptions of Longitudinal Cohort Studies**

| **Cohort Acronym** | **Geographic Region** | **Primary Characteristics** | **Measurement of Exposure (BMI)** | **Ascertainment of Outcome (CVD)** |
| --- | --- | --- | --- | --- |
| **CHARLS**  (China Health and Retirement Longitudinal Study) | China  (Nationally Representative) | A longitudinal survey of social, economic, and health circumstances of community-dwelling adults aged ≥45 years. | Height and weight were **physically measured** by trained interviewers during in-person interviews, and BMI was calculated. | Based on **self-reported** physician diagnosis (e.g., "Has a doctor ever told you that you had a heart attack or stroke?"). |
| **ELSA**  (English Longitudinal Study of Ageing) | England  (Nationally Representative) | A multidisciplinary study of the health, social, and economic well-being of residents aged ≥50 years. | Height and weight were **physically measured** by a nurse during a home visit, and BMI was calculated. | Ascertained through a combination of **self-reported** physician diagnosis, linkage to **Hospital Episode Statistics (HES)**, and national mortality records. |
| **HRS**  **(**Health and Retirement Study) | United States  (Nationally Representative) | A longitudinal panel study surveying the health, retirement, and economic status of adults aged ≥50 years. | Primarily based on **physical measurement** of height and weight by interviewers, with self-report permitted in some waves. | Primarily based on **self-reported** physician diagnosis, with linkage to **Medicare claims data** for a subset of participants for validation. |
| **ARIC**  **(**Atherosclerosis Risk in Communities Study) | United States  (4 Communities) | A prospective study designed to investigate the etiology of subclinical atherosclerosis and its clinical sequelae, aged ≥45 years. | Height and weight were **measured** at study centers by staff trained in standardized protocols. | Systematically identified through surveillance of community hospital records, discharge indices, and death certificates, with all potential CVD events **centrally adjudicated** by an expert committee. |
| **MESA**  **(**Multi-Ethnic Study of Atherosclerosis) | United States  (6 Communities) | A multi-ethnic cohort of adults ,aged ≥45 years, free of clinical CVD at baseline, designed to study the prevalence, correlates, and progression of subclinical CVD. | Height and weight were **measured** at study centers by staff trained in standardized protocols. | Ascertained through periodic participant follow-up and medical record review, with all CVD events **centrally adjudicated** by an expert committee. |
| **MHAS**  **(**Mexican Health and Aging Study) | Mexico  (Nationally Representative) | A national longitudinal study of the aging process, health status, and well-being of adults aged ≥50 years. | Height and weight were **physically measured** by trained interviewers during in-person interviews, and BMI was calculated. | Based on **self-reported** physician diagnosis. |
| **SHARE**  **(**Survey of Health, Ageing and Retirement in Europe) | Europe  (Multiple Countries) & Israel | A cross-national panel database on health, socioeconomic status, and family networks of individuals aged ≥50 years. | Height and weight data were obtained through a combination of **physical measurement** and **self-report**. | Based on **self-reported** physician diagnosis. |

**Table S2 Data Sources and Sample Characteristics for National-Level Projections**

| Country | Survey Year | Age Range | Original Sample Size | Eligible Sample Size | Age < 50  years old | Missing BMI | Missing Weights |
| --- | --- | --- | --- | --- | --- | --- | --- |
| Afghanistan | 2018 | 50-69 | 3,955 | 250 | 3,062 | 3 | 2 |
| Algeria | 2016 | 50-69 | 6,989 | 779 | 5,029 | 61 | 0 |
| American Samoa | 2016 | 50-69 | 2,349 | 441 | 1,372 | 95 | 0 |
| Armenia | 2016 | 50-69 | 2,349 | 440 | 1,372 | 116 | 0 |
| Aruba | 2023 | 50-69 | 2,376 | 863 | 9,18 | 58 | 0 |
| Austria | 2019 | 50-95 | 7,575 | 643 | 5,635 | 29 | 0 |
| Azerbaijan | 2017 | 50-69 | 2,801 | 631 | 1,574 | 45 | 0 |
| Bahamas | 2019 | 50-69 | 2,363 | 476 | 1,511 | 59 | 0 |
| Bangladesh | 2018 | 50-69 | 8,185 | 192 | 6,376 | 8 | 0 |
| Belarus | 2016 | 50-69 | 5,010 | 1,322 | 2,703 | 2 | 0 |
| Belgium | 2019 | 50-69 | 10,900 | 714 | 8,658 | 45 | 2 |
| Benin | 2015 | 50-69 | 5,126 | 144 | 4,107 | 10 | 0 |
| Botswana | 2014 | 50-69 | 4,070 | 289 | 3,227 | 20 | 0 |
| Brunei Darussalam | 2015 | 50-69 | 3,808 | 274 | 2,511 | 698 | 0 |
| Bulgaria | 2019 | 50-89 | 2,021 | 349 | 1,123 | 82 | 1 |
| Cambodia | 2010 | 50-64 | 5,433 | 105 | 3,724 | 27 | 0 |
| China | 2018 | 50-94 | 20,967 | 828 | 4,582 | 3,365 | 108 |
| Comors | 2011 | 50-64 | 5,517 | 294 | 4,118 | 35 | 0 |
| Croatia | 2019 | 50-93 | 5,906 | 832 | 3,902 | 55 | 1 |
| Cyprus | 2019 | 50-94 | 1,331 | 187 | 793 | 54 | 0 |
| Czechia | 2019 | 50-94 | 9,685 | 1,481 | 6,674 | 47 | 0 |
| Democratic Republic of Sao Tome and Principe | 2019 | 50-69 | 2,418 | 141 | 1,945 | 11 | 0 |
| Democratic Republic of Timor-Leste | 2014 | 50-69 | 2,609 | 25 | 1,872 | 20 | 0 |
| Denmark | 2019 | 50-97 | 6,185 | 699 | 3,837 | 54 | 2 |
| Ecuador | 2018 | 50-69 | 4,638 | 629 | 3,239 | 31 | 0 |
| Eritrea | 2010 | 50-74 | 6,265 | 85 | 3,963 | 14 | 0 |
| Estonia | 2019 | 50-95 | 8,611 | 1,541 | 5,247 | 80 | 0 |
| Eswatini | 2014 | 50-69 | 3,534 | 324 | 2,734 | 105 | 0 |
| Ethiopia | 2015 | 50-69 | 13,802 | 97 | 10,986 | 39 | 0 |
| Fiji | 2011 | 50-64 | 2,588 | 414 | 1,714 | 6 | 0 |
| Finland | 2019 | 50-91 | 2,702 | 410 | 1,543 | 23 | 0 |
| France | 2019 | 50-95 | 9,404 | 929 | 6,423 | 61 | 0 |
| Fresh Ploynesia | 2010 | 50-64 | 3,469 | 412 | 2,609 | 7 | 0 |
| Georgia | 2016 | 50-69 | 4,204 | 1,272 | 2,077 | 83 | 0 |
| Germany | 2019 | 50-94 | 11,091 | 1,378 | 7,256 | 39 | 3 |
| Greece | 2019 | 50-94 | 6,653 | 1,147 | 3,667 | 63 | 0 |
| Guyana | 2016 | 50-69 | 2,662 | 353 | 1,851 | 6 | 0 |
| Hungary | 2019 | 50-90 | 4,029 | 545 | 2,825 | 23 | 1 |
| Iraq | 2015 | 50-85 | 4,035 | 746 | 2,867 | 16 | 0 |
| Israel | 2019 | 50-94 | 4,576 | 465 | 3,162 | 131 | 0 |
| Italy | 2019 | 50-94 | 8,562 | 716 | 6,402 | 61 | 1 |
| Jordan | 2019 | 50-69 | 5,731 | 920 | 4,292 | 110 | 0 |
| Kenya | 2015 | 50-69 | 4,499 | 166 | 3,545 | 22 | 0 |
| Kiribati | 2014 | 50-69 | 2,156 | 134 | 1,669 | 184 | 0 |
| Kuwait | 2014 | 50-69 | 3,918 | 480 | 3,210 | 61 | 0 |
| Kyrgyzstan | 2013 | 50-64 | 2,623 | 459 | 1,714 | 3 | 0 |
| Latvia | 2019 | 50-93 | 2,663 | 567 | 1,471 | 26 | 0 |
| Lebanon | 2017 | 50-70 | 4,034 | 601 | 2,687 | 126 | 0 |
| Liberia | 2011 | 50-64 | 2,503 | 127 | 2,058 | 14 | 0 |
| Libya | 2009 | 50-69 | 3,590 | 365 | 2,862 | 35 | 0 |
| Lithuania | 2019 | 50-93 | 2,152 | 653 | 730 | 18 | 4 |
| Luxembourg | 2019 | 51-92 | 2,200 | 318 | 1,250 | 40 | 0 |
| Malawi | 2017 | 50-69 | 4,187 | 114 | 3,261 | 8 | 0 |
| Malta | 2019 | 52-92 | 1,314 | 444 | 510 | 58 | 0 |
| Mexico | 2018 | 50-95 | 26,839 | 5,966 | 10,971 | 1,793 | 0 |
| Micronesia | 2016 | 50-69 | 2,048 | 327 | 1,287 | 220 | 0 |
| Mongolia | 2019 | 50-70 | 6,654 | 856 | 4,665 | 20 | 0 |
| Morocco | 2017 | 50-87 | 5,399 | 792 | 3,351 | 18 | 0 |
| Myanmar | 2014 | 50-64 | 8,271 | 427 | 5,191 | 94 | 0 |
| Nauru | 2015 | 50-69 | 1,375 | 150 | 1,145 | 47 | 0 |
| Nepal | 2019 | 50-69 | 5,593 | 123 | 4,032 | 0 | 0 |
| Netherlands | 2019 | 51-95 | 6,651 | 505 | 4,715 | 59 | 0 |
| Niue | 2011 | 50-81 | 904 | 276 | 526 | 4 | 0 |
| Pakistan | 2013 | 50-69 | 7,366 | 300 | 5,938 | 102 | 0 |
| Palau | 2011 | 50-64 | 2,214 | 457 | 1,400 | 7 | 0 |
| Poland | 2019 | 50-95 | 8,219 | 1,267 | 5,399 | 73 | 2 |
| Qatar | 2012 | 50-64 | 2,496 | 321 | 1,999 | 7 | 0 |
| Republic of Moldova | 2013 | 50-69 | 4,807 | 1,161 | 2,544 | 129 | 0 |
| Romania | 2019 | 51-93 | 2,198 | 588 | 932 | 45 | 1 |
| Rwanda | 2012 | 50-64 | 7,226 | 49 | 6,015 | 17 | 0 |
| Saint Lucia | 2019 | 50-69 | 2,964 | 556 | 1,715 | 65 | 0 |
| Seychelles | 2004 | 50-64 | 1,255 | 214 | 781 | 0 | 0 |
| Slovakia | 2019 | 50-85 | 2,105 | 335 | 1,119 | 45 | 2 |
| Slovenia | 2019 | 50-95 | 8,611 | 1,541 | 5,247 | 80 | 0 |
| Solomon Islands | 2015 | 50-69 | 2,533 | 144 | 1,949 | 109 | 4 |
| Spain | 2019 | 52-95 | 9,326 | 758 | 7,199 | 223 | 0 |
| Sudan | 2016 | 50-69 | 7,722 | 388 | 5,928 | 28 | 0 |
| Sweden | 2019 | 50-95 | 6,941 | 715 | 4,417 | 37 | 1 |
| Switzerland | 2019 | 50-95 | 4,923 | 511 | 2,843 | 38 | 0 |
| Tajikistan | 2016 | 50-69 | 2,718 | 283 | 2,024 | 5 | 0 |
| The Central African Republic | 2010 | 50-64 | 4,029 | 135 | 2,993 | 9 | 0 |
| The Cook Islands | 2013 | 50-64 | 1,272 | 229 | 827 | 139 | 0 |
| The Democratic Socialist Republic of Sri Lanka | 2021 | 50-69 | 6,267 | 498 | 3,790 | 181 | 0 |
| The Lao People’s Democratic Republic | 2013 | 50-65 | 2,564 | 64 | 1,985 | 1 | 0 |
| The Republic of Cabo Verde | 2020 | 50-69 | 4,653 | 480 | 3,237 | 19 | 0 |
| The United Republic of Tanzania | 2012 | 50-64 | 5,680 | 171 | 4,229 | 35 | 0 |
| Togo | 2010 | 50-64 | 4,370 | 61 | 3,729 | 7 | 0 |
| Tokelau | 2014 | 50-64 | 554 | 125 | 4,01 | 2 | 0 |
| Tonga | 2017 | 50-69 | 3,858 | 793 | 2,806 | 59 | 0 |
| Turkmenistan | 2018 | 50-69 | 4,053 | 381 | 3,010 | 7 | 0 |
| Tuvalu | 2015 | 50-69 | 1,155 | 265 | 7,45 | 35 | 0 |
| Uganda | 2014 | 50-69 | 3,987 | 71 | 3,296 | 20 | 0 |
| Ukraine | 2019 | 50-69 | 4,409 | 1,086 | 2,205 | 92 | 0 |
| United Kingdom | 2016 | 54-90 | 19,802 | 2,248 | 11,447 | 1,680 | 1,373 |
| United States of America | 2022 | 56-95 | 45,234 | 6,706 | 29,744 | 265 | 2,471 |
| Vanuatu | 2011 | 50-64 | 4,649 | 299 | 3,464 | 26 | 0 |
| VietNam | 2015 | 50-69 | 3,578 | 76 | 2,331 | 159 | 0 |
| Wallis et Futuna | 2019 | 50-69 | 1,262 | 347 | 769 | 27 | 0 |
| Zambia | 2017 | 50-69 | 4,302 | 133 | 3,470 | 27 | 0 |

**Table S3 Remaining lifetime risk by age and BMI category for CVD event in all participants**

| Age | Remaining Lifetime Risk (%) | | | Age |  | Remaining Lifetime Risk (%) | | |
| --- | --- | --- | --- | --- | --- | --- | --- | --- |
| Normal | Overweight | Obesity | Normal | | Overweight | Obesity |
| 50 | 0.00 (0.00, 0.95) | 0.00 (0.00, 0.90) | 0.00 (0.00, 1.20) | 73 | 22.37 (21.42, 23.32) | | 25.67 (24.77, 26.56) | 29.03 (27.83, 30.22) |
| 51 | 0.44 (0.00, 1.39) | 0.66 (0.00, 1.55) | 0.64 (0.00, 1.84) | 74 | 23.86 (22.92, 24.81) | | 27.22 (26.32, 28.11) | 30.78 (29.58, 31.98) |
| 52 | 0.97 (0.02, 1.92) | 1.26 (0.37, 2.16) | 1.28 (0.08, 2.48) | 75 | 25.31 (24.37, 26.26) | | 28.92 (28.03, 29.82) | 32.84 (31.64, 34.03) |
| 53 | 1.51 (0.56, 2.46) | 1.90 (1.00, 2.80) | 2.16 (0.97, 3.36) | 76 | 26.76 (25.81, 27.71) | | 30.81 (29.91, 31.70) | 34.76 (33.56, 35.96) |
| 54 | 2.05 (1.10, 3.00) | 2.55 (1.66, 3.45) | 2.74 (1.54, 3.94) | 77 | 28.27 (27.33, 29.22) | | 32.58 (31.68, 33.47) | 36.77 (35.57, 37.96) |
| 55 | 2.65 (1.70, 3.60) | 3.31 (2.41, 4.21) | 3.56 (2.36, 4.75) | 78 | 30.00 (29.05, 30.95) | | 34.26 (33.36, 35.15) | 38.53 (37.34, 39.73) |
| 56 | 3.37 (2.42, 4.31) | 4.07 (3.17, 4.96) | 4.62 (3.42, 5.81) | 79 | 31.84 (30.89, 32.79) | | 36.13 (35.23, 37.03) | 40.54 (39.34, 41.74) |
| 57 | 4.10 (3.15, 5.04) | 4.87 (3.97, 5.76) | 5.52 (4.32, 6.72) | 80 | 33.53 (32.58, 34.47) | | 37.94 (37.04, 38.83) | 42.44 (41.24, 43.64) |
| 58 | 4.79 (3.84, 5.74) | 5.84 (4.94, 6.74) | 6.62 (5.42, 7.82) | 81 | 35.37 (34.42, 36.32) | | 39.54 (38.64, 40.44) | 44.15 (42.95, 45.35) |
| 59 | 5.58 (4.64, 6.53) | 6.86 (5.96, 7.76) | 7.67 (6.47, 8.86) | 82 | 37.09 (36.14, 38.04) | | 41.37 (40.47, 42.27) | 46.10 (44.91, 47.30) |
| 60 | 6.57 (5.63, 7.52) | 7.86 (6.97, 8.76) | 8.96 (7.76, 10.16) | 83 | 38.79 (37.84, 39.74) | | 43.20 (42.30, 44.10) | 47.85 (46.65, 49.05) |
| 61 | 7.45 (6.50, 8.40) | 8.89 (7.99, 9.78) | 10.34 (9.14, 11.54) | 84 | 40.76 (39.81, 41.71) | | 45.25 (44.35, 46.15) | 49.82 (48.62, 51.02) |
| 62 | 8.45 (7.51, 9.40) | 10.11 (9.22, 11.01) | 11.69 (10.49, 12.89) | 85 | 42.46 (41.51, 43.41) | | 47.05 (46.15, 47.95) | 51.68 (50.48, 52.87) |
| 63 | 9.38 (8.43, 10.33) | 11.30 (10.40, 12.19) | 12.89 (11.69, 14.08) | 86 | 44.05 (43.10, 44.99) | | 49.03 (48.13, 49.92) | 53.50 (52.30, 54.70) |
| 64 | 10.46 (9.52, 11.41) | 12.52 (11.62, 13.41) | 14.35 (13.16, 15.55) | 87 | 45.79 (44.85, 46.74) | | 50.79 (49.90, 51.69) | 55.42 (54.22, 56.62) |
| 65 | 11.63 (10.68, 12.58) | 13.74 (12.85, 14.64) | 15.89 (14.69, 17.08) | 88 | 47.44 (46.49, 48.38) | | 52.35 (51.46, 53.25) | 57.22 (56.02, 58.42) |
| 66 | 12.84 (11.90, 13.79) | 15.12 (14.22, 16.02) | 17.55 (16.35, 18.75) | 89 | 49.21 (48.26, 50.16) | | 54.24 (53.35, 55.14) | 58.58 (57.39, 59.78) |
| 67 | 14.01 (13.06, 14.96) | 16.50 (15.61, 17.40) | 18.94 (17.74, 20.14) | 90 | 50.74 (49.80, 51.69) | | 56.29 (55.39, 57.18) | 60.40 (59.20, 61.59) |
| 68 | 15.28 (14.33, 16.22) | 17.89 (16.99, 18.79) | 20.50 (19.31, 21.70) | 91 | 52.22 (51.27, 53.17) | | 57.78 (56.88, 58.67) | 61.52 (60.32, 62.72) |
| 69 | 16.53 (15.59, 17.48) | 19.37 (18.47, 20.26) | 22.17 (20.98, 23.37) | 92 | 53.30 (52.36, 54.25) | | 59.24 (58.34, 60.13) | 62.73 (61.53, 63.93) |
| 70 | 17.86 (16.91, 18.81) | 20.91 (20.01, 21.80) | 23.81 (22.61, 25.01) | 93 | 54.40 (53.45, 55.35) | | 60.56 (59.66, 61.46) | 63.66 (62.46, 64.86) |
| 71 | 19.45 (18.51, 20.40) | 22.53 (21.64, 23.43) | 25.56 (24.36, 26.75) | 94 | 55.53 (54.58, 56.48) | | 61.58 (60.69, 62.48) | 64.83 (63.63, 66.03) |
| 72 | 20.90 (19.95, 21.85) | 24.11 (23.21, 25.01) | 27.30 (26.10, 28.50) | 95 | 56.36 (55.41, 57.31) | | 62.26 (61.36, 63.15) | 65.59 (64.39, 66.78) |

**Table S4 Age-specific mortality adjusted for 10-year, 20-year, 30-year CVD risk by BMI category and Sex**

|  | Index Age 50y | | |  | Index Age 60y | | |  | Index Age 70y | | |  | Index Age 80y | | |
| --- | --- | --- | --- | --- | --- | --- | --- | --- | --- | --- | --- | --- | --- | --- | --- |
| Normal | Overweight | Obesity |  | Normal | Overweight | Obesity |  | Normal | Overweight | Obesity |  | Normal | Overweight | Obesity |
| **All** |  |  |  |  |  |  |  |  |  |  |  |  |  |  |  |
| 10-Year Risk (%) | 6.57  (5.63, 7.52) | 7.86  (6.97, 8.76) | 8.96  (7.76, 10.16) |  | 12.29  (11.28, 13.29) | 14.37  (13.41, 15.33) | 16.61  (15.31, 17.92) |  | 20.66  (19.50, 21.83) | 23.04  (21.91, 24.17) | 26.41  (24.81, 28.00) |  | 32.91  (31.38, 34.44) | 36.70  (35.16, 38.24) | 40.24  (37.90, 42.59) |
| 20-Year Risk (%) | 17.86  (16.91, 18.81) | 20.91  (20.01, 21.80) | 23.81  (22.61, 25.01) |  | 29.35  (28.35, 30.36) | 33.13  (32.17, 34.09) | 37.46  (36.15, 38.76) |  | 43.37  (42.21, 44.53) | 47.86  (46.73, 49.00) | 51.85  (50.26, 53.45) |  | - | - | - |
| 30-Year Risk (%) | 33.53  (32.58, 34.47) | 37.94  (37.04, 38.83) | 42.44  (41.24, 43.64) |  | 48.10  (47.10, 49.11) | 53.34  (52.38, 54.30) | 57.54  (56.24, 58.85) |  | - | - | - |  | - | - | - |
| Remaining Lifetime Risk (%) | 56.36  (55.41, 57.31) | 62.26  (61.36, 63.15) | 65.59  (64.39, 66.78) |  | 54.22  (53.22, 55.23) | 59.92  (58.96, 60.88) | 63.35  (62.04, 64.65) |  | 50.78  (49.62, 51.94) | 55.95  (54.81,57.08) | 59.21  (57.62, 60.80) |  | 43.66  (42.13, 45.18) | 48.64  (47.10, 50.19) | 51.87  (49.53, 54.22) |
| **Male** |  |  |  |  |  |  |  |  |  |  |  |  |  |  |  |
| 10-Year Risk (%) | 5.57  (4.27, 6.88) | 6.94  (5.58, 8.29) | 8.04  (6.45, 9.64) |  | 10.29  (8.92, 11.67) | 12.30  (10.86, 13.74) | 14.97  (13.25, 16.70) |  | 18.87  (17.32, 20.42) | 20.97  (19.31, 22.62) | 24.61  (22.54, 26.67) |  | 31.86  (29.90, 33.82) | 35.83  (33.67, 38.00) | 39.96  (37.03, 42.88) |
| 20-Year Risk (%) | 15.18  (13.87, 16.49) | 18.25  (16.89, 19.60) | 21.59  (19.99, 23.19) |  | 26.50  (25.12, 27.88) | 29.98  (28.54, 31.42) | 34.91  (33.19, 36.64) |  | 42.12  (40.57, 43.67) | 46.56  (44.91, 48.22) | 51.11  (49.04, 53.18) |  | - | - | - |
| 30-Year Risk (%) | 30.30  (28.99, 31.60) | 34.49  (33.14, 35.85) | 39.63  (38.03, 41.22) |  | 46.46  (45.09, 47.84) | 51.56  (50.12, 53.00) | 56.39  (54.66, 58.12) |  | - | - | - |  | - | - | - |
| Remaining Lifetime Risk (%) | 55.47  (54.16, 56.77) | 60.76  (59.41, 62.12) | 65.14  (63.54, 66.74) |  | 53.48  (52.11, 54.86) | 58.56  (57.12, 60.00) | 63.12  (61.39, 64.85) |  | 50.29  (48.74, 51.85) | 54.87  (53.21, 56.52) | 59.41  (57.34, 61.48) |  | 43.06  (41.10, 45.02) | 47.46  (45.30, 49.62) | 52.47  (49.54, 55.40) |
| **Female** |  |  |  |  |  |  |  |  |  |  |  |  |  |  |  |
| 10-Year Risk (%) | 8.22  (6.86, 9.59) | 8.72  (7.53, 9.91) | 10.46  (8.67, 12.26) |  | 15.18  (13.73, 16.64) | 16.26  (14.98, 17.54) | 19.10  (17.13, 21.07) |  | 23.28  (21.53, 25.03) | 25.03  (23.48, 26.58) | 29.31  (26.83, 31.79) |  | 34.66  (32.22, 37.09) | 37.63  (35.43, 39.82) | 40.80  (36.91, 44.69) |
| 20-Year Risk (%) | 21.79  (20.43, 23.16) | 23.32  (22.13, 24.51) | 27.21  (25.42, 29.00) |  | 33.29  (31.83, 34.75) | 35.98  (34.70, 37.26) | 41.30  (39.33, 43.27) |  | 45.17  (43.43, 46.92) | 49.11  (47.57, 50.66) | 53.07  (50.59, 55.55) |  | - | - | - |
| 30-Year Risk (%) | 37.98  (36.62, 39.34) | 41.01  (39.82, 42.20) | 46.66  (44.87, 48.45) |  | 50.32  (48.86, 51.78) | 54.95  (53.67, 56.23) | 59.30  (57.33, 61.27) |  | - | - | - |  | - | - | - |
| Remaining Lifetime Risk (%) | 57.59  (56.22, 58.95) | 63.61  (62.42, 64.80) | 66.25  (64.46, 68.04) |  | 55.22  (53.77, 56.68) | 61.17  (59.89, 62.45) | 63.65  (61.68, 65.62) |  | 51.47  (49.73, 53.22) | 57.01  (55.46, 58.56) | 58.82  (56.33, 61.30) |  | 44.63  (42.19, 47.06) | 49.96  (47.76, 52.16) | 50.67  (46.78, 54.56) |

**Table S5 Estimated lifetime risk and Incidence rate by BMI category for CVD events in each cohort**

| Cohort | Remaining Lifetime Risk (%) | | |  |  | Events per 1,000 person-year (95% CI) | |
| --- | --- | --- | --- | --- | --- | --- | --- |
| Normal | Overweight | Obesity | Normal | Overweight | Obesity |
| Pooled | 56.4 (55.4, 57.3) | 62.3 (61.4, 63.2) | 65.5 (64.5, 66.8) |  | 18.4(18.0, 18.8) | 21.7(21.3, 22.10) | 23.8(23.3, 24.4) |
| ARIC | 39.3 (36.6, 42.0) | 47.0 (45.0, 49.0) | 51.8 (49.6, 54.0) |  | 11.15（10.55, 11.80） | 15.28(14.62, 16.00) | 18.91(18.01, 19.86) |
| MESA | 29.0 (24.9, 33.0) | 33.5 (29.6, 37.5) | 36.0 (31.0, 41.0) |  | 7.85(6.78, 9.09) | 9.56(8.54, 10.70) | 9.98(8.83, 11.28) |
| HRS | 65.1 (61.9, 68.2) | 70.8 (68.2, 73.3) | 77.5 (74.7, 80.3) |  | 24.21(22.52, 26.02) | 25.42(24.06, 26.78) | 27.69(26.38, 29.07) |
| CHARLS | 65.4 (63.0, 67.8) | 77.0 (73.6, 80.4) | 85.7 (80.0, 91.5) |  | 25.70(24.52, 26.94) | 34.65(32.53, 36.91) | 45.54(39.70, 52.18) |
| ELSA | 41.8 (35.7, 47.9) | 42.6 (36.7, 48.5) | 42.1 (35.3, 49.0) |  | 8.51(7.42, 9.57) | 8.49(7.62, 9.50) | 10.04(8.91, 11.32) |
| MHAS | 25.5 (20.9, 30.2) | 40.1 (34.7, 45.6) | 44.1 (36.7, 51.6) |  | 8.82(7.16, 10.87) | 11.83(10.28, 13.60) | 12.16(10.36, 14.26) |
| SHARE | 64.6 (63.3, 65.9) | 71.7 (70.6, 72.8) | 76.5 (75.0, 77.9) |  | 22.45(21.78, 23.15) | 28.64(27.91, 29.38) | 34.88(33.70, 36.11) |

**Table S6 Semaglutide Eligibility Prevalence and Estimated Eligible Population in Adults Aged ≥50 Years, by Country**

| Country | Survey Year | Age Range(years) | Total Population (95% CI),  thousands | Total Eligible Population (95% CI), thousands | Overall Eligible Prevalence (%) |
| --- | --- | --- | --- | --- | --- |
| Tokelau | 2014 | 50-64 | 0.28 (0.27, 0.28) | 0.22 (0.20, 0.24) | 81.45 (74.28, 88.63) |
| Nauru | 2015 | 50-66 | 1.00 (1.00, 1.01) | 0.82 (0.75, 0.88) | 81.13 (74.91, 87.35) |
| Tonga | 2017 | 50-69 | 12.62 (12.03, 13.22) | 10.15 (9.54,10.77) | 80.45 (74.28, 86.62) |
| Wallis et Futuna | 2019 | 50-69 | 2.55 (2.42, 2.68) | 1.98 (1.83, 2.12) | 77.53 (70.55, 84.51) |
| The Cook Islands | 2013 | 50-64 | 2.79 (2.63, 2.95) | 2.13 (1.94, 2.32) | 76.54 (68.41, 84.68) |
| Kuwait | 2014 | 50-69 | 435.02 (431.31, 438.72) | 318.30 (302.70, 333.90) | 73.17 (69.53, 76.81) |
| Niue | 2011 | 50-81 | 0.54 (0.53, 0.54) | 0.40 (0.37, 0.42) | 73.00 (68.20, 77.77) |
| Tuvalu | 2015 | 50-69 | 1.76 (1.64, 1.88) | 1.21 (1.08, 1.33) | 68.60 (60.00,77.20) |
| Jordan | 2019 | 50-69 | 1201.67 (1132.98, 1270.35) | 766.59 (702.48, 830.70) | 63.79 (57.33, 70.26) |
| Iraq | 2015 | 50-85 | 3655.57 (3507.17, 3803.96) | 2329.84 (2173.40, 2486.27) | 63.73 (58.73, 68.73) |
| Qatar | 2012 | 50-64 | 144.91 (135.11, 154.71) | 91.19 (80.94,101.43) | 62.93 (54.68, 71.18) |
| Aruba | 2023 | 50-69 | 31.73 (30.94, 32.52) | 19.89 (18.88, 20.91) | 62.70 (59.15, 66.26) |
| Malta | 2019 | 52-92 | 164.65(158.71, 170.59) | 101.13( 93.59, 109.09) | 61.55 (56.34, 66.75) |
| Palau | 2011 | 50-64 | 3.01 (2.90, 3.11) | 1.82 (1.69, 1.95) | 60.45 (55.64, 65.25) |
| Bahamas | 2019 | 50-69 | 79.37 (71.44, 87.31) | 47.64 (47.70, 53.58) | 60.02 (50.43, 69.62) |
| Libya | 2009 | 50-69 | 452.30 (431.37, 473.25) | 262.31 (239.39, 285.23) | 58.00 (52.26, 63.73) |
| Georgia | 2016 | 50-69 | 904.89 (874.89, 934.89) | 524.77 (494.61, 554.92) | 57.99 (54.15, 61.84) |
| Micronesia | 2016 | 50-69 | 14.67 (13.52, 15.82) | 8.47 (7.43, 9.50) | 57.70 (49.31, 66.08) |
| Belarus | 2016 | 50-69 | 2500.48 (2442.05, 2558.90) | 1411.00 (1344.14, 1477.88) | 56.43 (53.45,59.41) |
| Kiribati | 2014 | 50-69 | 12.87 (10.34, 15.39) | 6.97 (5.06, 8.87) | 54.14 (35.91, 72.37) |
| Fresh Ploynesia | 2010 | 50-64 | 34.18 (32.60, 35.77) | 18.40 (16.78, 20.00) | 53.81 (48.48, 59.15) |
| Ukraine | 2019 | 50-69 | 12214.32 (11478.71, 12949.94) | 6258.44 (5658.86, 6858.03) | 51.24 (45.44, 57.04) |
| Azerbaijan | 2017 | 50-69 | 1911.57 (1850.94,1972.20) | 977.02 (907.44, 1046.61) | 51.11 (47.13, 55.10) |
| United States of America | 2022 | 56-100 | 85876.48(84678.96, 87074.00) | 43407.03(42243.24, 44570.82) | 50.55 (49.02, 52.07)) |
| Czechia | 2019 | 50-94 | 3457.33 (3301.64, 3613.02) | 1734.25 (1612.75, 1855.75) | 50.16 (45.98, 54.34) |
| Republic of Moldova | 2013 | 50-69 | 808.95 (785.26, 832.63) | 403.62 (379.44,427.81) | 49.89 (46.57, 53.22) |
| Romania | 2019 | 51-93 | 7012.52 (6763.25, 7261.79) | 3474.38(3214.75, 3734.01) | 49.55 (45.45, 53.65) |
| Kyrgyzstan | 2013 | 50-64 | 710.59 (672.09, 749.08) | 345.39 (310.20, 380.58) | 48.61 (43.00, 54.21) |
| Latvia | 2019 | 50-93 | 767.52(750.77, 784.28) | 371.79 (346.26, 397.33) | 48.44 (44.95, 51.93) |
| Eswatini | 2014 | 50-69 | 98.95 (91.15, 106.76) | 47.52 (40.96, 54.09) | 48.03 (40.39,55.66) |
| Hungary | 2019 | 50-90 | 3723.41 (3600.18, 3846.64) | 1767.54 (1626.66, 1908.42) | 47.47 (43.37, 51.57) |
| Fiji | 2011 | 50-64 | 105.78 (103.22, 108.35) | 50.05 (46.10, 53.99) | 47.31 (43.40, 51.21) |
| Estonia | 2019 | 50-95 | 505.47 (498.43, 512.52) | 236.52 (226.23, 246.81) | 46.80 (44.65, 49.83) |
| Brunei Darussalam | 2015 | 50-69 | 59.61 (56.42, 62.79) | 27.89 (24.56, 31.22) | 46.79 (40.66, 52.91) |
| Lithuania | 2019 | 50-93 | 1144.48 (1123.84, 1165.13) | 534.55 (500.34, 568.76) | 46.71 43.60, 49.81) |
| Saint Lucia | 2019 | 50-69 | 35.25 (34.52, 35.98) | 16.46 (15.31, 17.60) | 46.69 (43.29, 50.08) |
| Lebanon | 2017 | 50-70 | 1104.22 (1025.26, 1183.18) | 515.10 (455.77, 574.47) | 46.65 (40.32, 52.97) |
| Poland | 2019 | 50-95 | 13533.73 (13277.60, 13789.87) | 6217.98 (5905.90, 6530.06) | 45.94 (43.48, 48.41) |
| Ecuador | 2018 | 50-69 | 2488.87 (2388.94, 2588.79) | 1137.44 (1043.57, 1231.31) | 45.70 (41.51, 49.90) |
| Seychelles | 2004 | 50-64 | 14.13 (14.02, 14.24) | 6.44 (5.76, 7.13) | 45.59 (40.72, 50.45) |
| United Kingdom | 2016 | 54-90 | 19918.54 (19613.07, 20224.01) | 9069.75 (8670.11, 9469.39) | 45.33 (43.41, 47.66) |
| Armenia | 2016 | 50-69 | 672.06(641.02, 703.09) | 302.37 (272.34, 332.40) | 44.99 (40.06, 49.92) |
| American Samoa | 2016 | 50-69 | 8.47 (8.07, 8.87) | 3.73 (3.3, 4.11) | 44.04 (39.10, 48.98) |
| Slovenia | 2019 | 50-95 | 841.51 (826.70, 856.32) | 356.39 (338.03, 374.74) | 42.35 40.05, 44.66) |
| Croatia | 2019 | 50-93 | 1659.62 (1627.00, 1692.23) | 698.54 (655.03, 742.05) | 42.10 (39.34, 44.84) |
| Spain | 2019 | 52-95 | 10335.73 (9852.97, 10818.49) | 4346.91 (3955.47, 4738.34) | 42.06 (37.79, 46.23) |
| Mongolia | 2019 | 50-70 | 453.60 (441.05, 466.15) | 189.76 (176.93, 202.60) | 41.83 (38.78, 44.89) |
| Mexico | 2018 | 50-100 | 24954.64 (24327.05, 25582.25) | 10362.90 (9907.51, 10818.29) | 41.53(39.42, 43.63) |
| Bulgaria | 2019 | 50-89 | 2583.95 (2496.82, 2671.08) | 1060.91 (954.32, 1167.50) | 41.06 (36.71, 45.41) |
| Guyana | 2016 | 50-69 | 112.29 (105.89, 118.69) | 45.70 (40.31, 51.09) | 40.70 (35.36, 46.03) |
| Tajikistan | 2016 | 50-69 | 916.50 (858.94, 974.05) | 371.42 321.85, 420.98) | 40.53 (35.44, 46.50) |
| Finland | 2019 | 50-91 | 2217.64(2062.17, 2373.12) | 896.64 (779.86, 1013.42) | 40.43 (34.45, 46.41) |
| Algeria | 2016 | 50-69 | 5403.75(5376.97, 5430.53) | 2142.45 (2022.03, 2262.88) | 39.65 (37.41, 41.88) |
| Greece | 2019 | 50-94 | 4438.30 (4366.87, 4509.74) | 1747.96 ( 1654.29, 1841.63) | 39.38 (37.18, 41.59) |
| Israel | 2019 | 50-94 | 1991.70 (1868.46, 2114.92) | 763.60 (658.57, 868.62) | 38.34 (32.56, 44.12) |
| Cyprus | 2019 | 50-94 | 273.19 (257.51, 288.87) | 103.40 (86.34, 120.46) | 37.85 (1.24, 44.46） |
| Turkmenistan | 2018 | 50-69 | 870.00(838.82, 901.18) | 315.76 (284.39, 347.12) | 36.29 (32.46, 40.13) |
| Germany | 2019 | 50-94 | 34727.86 (34328.58, 35127.14) | 12322.96 (11741.21, 12904.71) | 35.48 (33.76, 37.21) |
| Morocco | 2017 | 50-87 | 6848.51 (6737.67, 6959.34) | 2421.16(2265.02, 2577.31) | 35.35 (33.00, 37.70) |
| Luxembourg | 2019 | 51-92 | 191.79 (180.48, 203.11) | 66.70 (56.46, 76.93) | 34.77 (29.06, 40.49) |
| The Republic of Cabo Verde | 2020 | 50-69 | 71.80 (68.24, 75.36) | 24.46(21.76, 27.17) | 34.07(29.94, 38.20) |
| Belgium | 2019 | 50-69 | 4310.60 (4167.15, 4454.06) | 1398.66 (1287.85, 1509.47) | 32.45 (29.66, 35.24) |
| Denmark | 2019 | 50-97 | 2219.83 (2189.83, 2249.83) | 719.51 (671.53, 767.49) | 32.41 (30.21, 34.62) |
| Afghanistan | 2018 | 50-69 | 2445.73 (2133.31, 2758.15) | 777.41 (582.56, 972.26) | 31.79 (22.84, 40.73) |
| France | 2019 | 50-99 | 23836.08 (23492.38, 24179.77) | 7477.56 (7012.36, 7942.75) | 31.37 (29.37, 33.37) |
| Democratic Republic of Sao Tome and Principe | 2019 | 50-69 | 18.64 (17.59, 19.68) | 5.80 (4.80, 6.80) | 31.13 (25.49,36.77) |
| Austria | 2019 | 50-95 | 3512.74 （3372.88, 3652.60） | 1089.58 (986.08, 1193.08) | 31.02 (27.82, 34.21) |
| Sweden | 2019 | 50-95 | 3834.89 (3742.78, 3927.01) | 1146.01 (1042.43, 1249.59) | 29.88 (27.09, 32.68) |
| Vanuatu | 2011 | 50-64 | 20.26 (19.65, 20.88) | 5.95 (5.28, 6.61) | 29.34 (25.95, 32.74) |
| Liberia | 2011 | 50-64 | 298.54 (297.71, 299.36) | 87.10 (73.86, 100.34) | 29.18 (24.74, 33.61) |
| Solomon Islands | 2015 | 50-69 | 54.90 (51.18, 58.63) | 15.97 (13.17, 18.76) | 29.08 (23.62, 34.54) |
| Botswana | 2014 | 50-69 | 201.41 (187.44, 215.39) | 58.19 (48.90, 67.48) | 28.89 (23.86, 33.92) |
| Netherlands | 2019 | 51-95 | 5626.09 (5460.12, 5792.05) | 950.78 (696.44, 1205.12) | 26.17 (23.45, 28.89) |
| Italy | 2019 | 50-94 | 27006.19 (26080.36, 27932.03) | 6643.85 (6160.31, 7127.40) | 24.60 (22.05, 27.15)) |
| Slovakia | 2019 | 50-85 | 1871.50 (1827.84, 1915.17) | 455.95 (383.92, 527.98) | 24.36 (20.47, 28.25) |
| Sudan | 2016 | 50-69 | 3495.61 (3368.98, 3622.25) | 838.64 (734.08, 943.19) | 23.99 (20.88, 27.11) |
| Switzerland | 2019 | 50-98 | 3299.31 (3224.80, 3373.82) | 783.31 (702.49, 864.13) | 23.74 (21.23, 26.25) |
| The Democratic Socialist Republic of Sri Lanka | 2021 | 50-69 | 4650.74 (4536.88, 4764.59) | 1058.06 (960.39, 1155.73) | 22.75 (20.58, 24.92) |
| Pakistan | 2013 | 50-69 | 20070.61 (19031.04, 21110.18) | 4308.12(3583.56, 5032.69) | 21.46 (17.69, 25.24) |
| Zambia | 2017 | 50-69 | 1039.30 (983.75, 1094.85) | 191.18 (150.29, 232.06) | 18.39 (14.34, 22.45) |
| Comors | 2011 | 50-64 | 47.30 (45.21, 49.40) | 8.56 (7.22, 9.90) | 18.10 (15.16, 21.03) |
| Kenya | 2015 | 50-69 | 3262.52 (3067.46, 3457.58) | 541.69 (424.65, 658.73) | 16.60 (12.88, 20.33) |
| Benin | 2015 | 50-69 | 902.85 (851.76, 953.93) | 140.19 (111.09, 169.30) | 15.53 (12.19, 18.87) |
| The Central African Republic | 2010 | 50-64 | 297.46 (279.76, 315.16) | 42.13 (32.26, 52.01) | 14.16 (10.74, 17.59) |
| Myanmar | 2014 | 50-64 | 6480.86(6142.26, 6819.46) | 901.62 (757.31, 1045.93) | 13.91(11.57, 16.25) |
| Togo | 2010 | 50-64 | 480.44 (454.39, 506.50) | 65.87 (46.92, 84.82) | 13.71(9.7, 17.72) |
| The United Republic of Tanzania | 2012 | 50-64 | 2935.29 (2692.57, 3178.02) | 349.71 (276.66, 422.76) | 11.91(9.24, 14.59) |
| The Lao People’s Democratic Republic | 2013 | 50-64 | 564.00(533.49, 594.52) | 64.72 (47.87, 81.56) | 11.47(8.42, 14.53) |
| Uganda | 2014 | 50-69 | 2032.54(1903.32, 2161.76) | 188.00(130.45, 245.56) | 9.25(6.36, 12.14) |
| Malawi | 2017 | 50-69 | 1119.50 (1026.51, 1212.48) | 81.02 (66.42, 95.62) | 7.24 (5.80, 8.67) |
| VietNam | 2015 | 50-69 | 15407.74(14836.81, 15978.68) | 1029.65(765.43, 1293.87) | 6.68 (4.95, 8.42) |
| Bangladesh | 2018 | 50-69 | 21186.95 (20084.22, 22289.68) | 1375.32 (1186.13, 1564.50) | 6.49 (5.54, 7.45) |
| China | 2015 | 50-94 | 395725.85 (394697.21, 396754.50) | 24934.83(23237.69, 26631.97) | 6.39 (5.87, 6.73) |
| Cambodia | 2010 | 50-64 | 1332.08(1299.47, 1364.68) | 73.79(58.25, 89.32) | 5.54(4.37, 6.71) |
| Nepal | 2019 | 50-69 | 3677.03 (3486.29, 3867.78) | 185.70 (153.30, 218.10) | 5.05 (4.13, 5.97) |
| Eritrea | 2010 | 50-74 | 281.83(275.20, 288.47) | 14.018 (10.10, 17.94) | 4.97(3.58, 6.37) |
| Ethiopia | 2015 | 50-69 | 8161.54(7591.58, 8731.50) | 362.56(216.28, 508.85) | 4.44(2.62, 6.26) |
| Rwanda | 2012 | 50-64 | 754.81(745.68, 763.95) | 29.13 (20.86-37.40) | 3.86 (2.76, 4.96) |
| Democratic Republic of Timor-Leste | 2014 | 50-69 | 120.47 (102.78, 138.16) | 3.63 (1.88, 5.38) | 3.01 (1.49, 4.53) |

**Table S7 Projected Cardiovascular Events Prevented with Semaglutide Treatment Among Adults Aged ≥50 Years, by Country**

| Country | Prevented Events, thousands (95% CI) | Prevented Percentage (95% CI) |
| --- | --- | --- |
| United States of America | 3321.79 (1092.75, 5420.51) | 9.99% (3.29%, 16.30%) |
| China | 1850.76 (740.56, 2896.05) | 9.21% (3.68%, 14.41%) |
| Germany | 937.50 (313.44, 1525.08) | 9.87% (3.30%, 16.05%) |
| Mexico | 772.06 (299.54, 1216.96) | 9.33% (3.62%, 14.70%) |
| United Kingdom | 694.20 (228.07, 1133.09) | 9.98% (3.28%, 16.29%) |
| France | 566.16 (177.44, 932.16) | 9.96% (3.12%, 16.40%) |
| Italy | 511.13 (140.86, 859.75) | 10.38% (2.86%, 17.46%) |
| Poland | 470.40 (158.15, 764.39) | 9.80% (3.29%, 15.93%) |
| Ukraine | 461.69 (195.73, 712.10) | 9.02% (3.82%, 13.91%) |
| Spain | 328.90 (82.43, 560.95) | 10.45% (2.62%, 17.82%) |
| Pakistan | 315.25 (135.94, 484.08) | 8.90% (3.84%, 13.66%) |
| Romania | 262.82 (93.00, 422.71) | 9.68% (3.43%, 15.57%) |
| Iraq | 172.58 (70.70, 268.51) | 9.14% (3.74%, 14.22%) |
| Algeria | 157.24 (67.40, 241.83) | 8.94% (3.83%, 13.75%) |
| Bangladesh | 156.58 (66.49, 241.40) | 9.00% (3.82%, 13.88%) |
| Morocco | 135.72 (55.17, 211.16) | 9.49% (3.86, 14.77) |
| Hungary | 134.26 (48.86, 214.68) | 9.68% (3.52%, 15.47%) |
| Greece | 133.82 (40.21, 221.95) | 10.15% (3.05%, 16.84%) |
| Czech Republic | 133.28 (44.46, 216.91) | 10.00% (3.34%, 16.28%) |
| Netherlands | 113.04 (36.58, 185.02) | 10.09% (3.27%, 16.52%) |
| Belgium | 105.81 (34.22, 173.22) | 9.88% (3.19%, 16.17%) |
| Belarus | 104.09 (44.13, 160.55) | 9.02% (3.82%, 13.91%) |
| Sweden | 86.78 (28.00, 142.12) | 9.87% (3.19%, 16.17%) |
| Ecuador | 83.69 (35.69, 128.88) | 8.98% (3.83%, 13.83%) |
| Austria | 83.18 (27.49, 135.61) | 9.93% (3.28%, 16.20%) |
| Bulgaria | 80.89 (27.98, 130.71) | 9.83% (3.40%, 15.88%) |
| The Democratic Socialist Republic of Sri Lanka | 77.60 (33.33, 119.29) | 8.93% (3.84%, 13.73%) |
| Vietam | 75.55 (32.45, 116.13) | 8.93% (3.84%, 13.73%) |
| Azerbaijan | 71.85 (30.68, 110.62) | 8.97% (3.83%, 13.81%) |
| Finland | 68.28 (22.99, 110.92) | 9.86% (3.32%, 16.03%) |
| Myanmar | 65.60 (28.71, 100.33) | 8.80% (3.85%, 13.47%) |
| Sudan | 61.46 (26.43, 94.44) | 8.92% (3.84%, 13.71%) |
| Switzerland | 59.25 (18.95, 97.20) | 9.88% (3.16%, 16.21%) |
| Israel | 58.15 (19.38, 94.66) | 9.89% (3.29%, 16.09%) |
| Afghanistan | 56.88 (24.57, 87.31) | 8.89% (3.84%, 13.65%) |
| Jordan | 56.21 (24.15, 86.39) | 8.93% (3.84%, 13.72%) |
| Denmark | 54.36 (18.86, 87.78) | 9.72% (3.37%, 15.69%) |
| Croatia | 53.17 (18.28, 86.02) | 9.82% (3.38%, 15.88%) |
| Slovakia | 52.29 (18.72, 83.89) | 9.76% (3.50%, 15.67%) |
| Lithuania | 40.59 (14.06, 65.58) | 9.77% (3.38%, 15.79%) |
| Kenya | 39.49 (17.17, 60.51) | 8.84% (3.84%, 13.54%) |
| Georgia | 38.71 (16.41, 59.71) | 9.02% (3.82%, 13.91%) |
| Lebano | 37.90 (16.17, 58.36) | 8.98% (3.83%, 13.82%) |
| Republic of Moldova | 29.66 (12.69, 45.65) | 8.96% (3.83%, 13.79%) |
| Latvia | 28.28 (9.82, 45.66) | 9.79% (3.40%, 15.81%) |
| Slovenia | 27.10 (9.12, 44.03) | 9.85% (3.31%, 16.00%) |
| Ethiopia | 26.55 (11.42, 40.80) | 8.91% (3.83%, 13.69%) |
| The United Republic of Tanzania | 25.37 (11.17, 38.74) | 8.76% (3.86%, 13.38%) |
| Kyrgyzstan | 25.15 (10.99, 38.48) | 8.82% (3.85%, 13.49%) |
| Kuwait | 23.22 (10.09, 35.58) | 8.85% (3.85%, 13.56%) |
| Turkmenistan | 23.15 (9.95, 35.58) | 8.93% (3.84%, 13.72%) |
| Armenia | 22.24 (9.49, 34.25) | 8.98% (3.83%, 13.82%) |
| Nepal | 21.26 (9.14, 32.68) | 8.92% (3.84%, 13.72%) |
| Libya | 19.08 (8.35, 29.19) | 8.80% (3.85%, 13.47%) |
| Estonia | 17.97 (5.94, 29.29) | 9.87% (3.27%, 16.09%) |
| Zambia | 13.99 (6.04, 21.47) | 8.89% (3.84%, 13.65%) |
| Mongolia | 13.90 (5.99, 21.35) | 8.91% (3.84%, 13.68%) |
| Uganda | 13.67 (5.99, 20.90) | 8.79% (3.85%, 13.44%) |
| Benin | 10.26 (4.43, 15.75) | 8.90% (3.84%, 13.66%) |
| Malawi | 8.63 (3.70, 13.28) | 8.95% (3.83%, 13.77%) |
| Cyprus | 7.90 (2.80, 12.70) | 9.80% (3.47%, 15.76%) |
| Malta | 7.73 (2.75, 12.41) | 9.77% (3.47%, 15.70%) |
| Liberia | 6.33 (2.78, 9.67) | 8.78% (3.86%, 13.42%) |
| Qatar | 5.51 (2.43, 8.40) | 8.74% (3.86%, 13.33%) |
| Cambodia | 5.37 (2.35, 8.21) | 8.80% (3.85%, 13.47%) |
| Luxembourg | 5.04 (1.63, 8.26) | 9.86% (3.18%, 16.15%) |
| Togo | 4.78 (2.10, 7.31) | 8.78% (3.85%, 13.42%) |
| The Lao People’s Democratic Republic | 4.70 (2.06, 7.19) | 8.78% (3.85%, 13.43%) |
| Botswana | 4.26 (1.84, 6.55) | 8.91% (3.84%, 13.69%) |
| Fiji | 3.64 (1.59, 5.57) | 8.81% (3.85%, 13.48%) |
| Bahamas | 3.50 (1.50, 5.39) | 8.96% (3.83%, 13.80%) |
| Eswatini | 3.49 (1.49, 5.38) | 8.97% (3.83%, 13.80%) |
| Guyana | 3.35 (1.44, 5.15) | 8.92% (3.84%, 13.70%) |
| Tajikistan | 3.35 (1.44, 5.15) | 8.92% (3.84%, 13.70%) |
| The Central African Republic | 3.06 (1.34, 4.67) | 8.78% (3.85%, 13.41%) |
| Rwanda | 2.12 (0.93, 3.24) | 8.79% (3.85%, 13.43%) |
| Brunei | 2.04 (0.88, 3.13) | 8.88% (3.84%, 13.62%) |
| The Republic of Cabo Verde | 1.80 (0.77, 2.76) | 8.95% (3.83%, 13.76%) |
| Aruba | 1.47 (0.62, 2.27) | 9.03% (3.82%, 13.93%) |
| Fresh Polynesia | 1.34 (0.59, 2.05) | 8.80% (3.85%, 13.46%) |
| Saint Lucia | 1.21 (0.52, 1.86) | 8.95% (3.83%, 13.77%) |
| Solomon | 1.17 (0.50, 1.79) | 8.88% (3.84%, 13.63%) |
| Eritrea | 1.03 (0.44, 1.59) | 9.01% (3.81%, 13.90%) |
| Tonga | 0.74 (0.32, 1.14) | 8.93% (3.83%, 13.73%) |
| Micronesia | 0.62 (0.27, 0.95) | 8.92% (3.84%, 13.71%) |
| Tuvalu | 0.62 (0.27, 0.95) | 8.92% (3.84%, 13.71%) |
| Comors | 0.62 (0.27, 0.95) | 8.79% (3.85%, 13.44%) |
| Kiribate | 0.51 (0.22, 0.78) | 8.85% (3.84%, 13.57%) |
| Seychelles | 0.47 (0.21, 0.72) | 8.79% (3.85%, 13.43%) |
| Vanuatu | 0.43 (0.19, 0.66) | 8.77% (3.86%, 13.39%) |
| Democratic Republic of Sao Tome and Principe | 0.43 (0.18, 0.65) | 8.92% (3.84%, 13.71%) |
| American Samoa | 0.27 (0.12, 0.42) | 8.93% (3.83%, 13.73%) |
| Democratic Republic of Timor-Leste | 0.26 (0.12, 0.40) | 8.76% (3.85%, 13.39%) |
| The Cook Islands | 0.16 (0.07, 0.24) | 8.81% (3.85%, 13.48%) |
| Wallis et Futuna | 0.15 (0.06, 0.22) | 8.96% (3.83%, 13.80%) |
| Palau | 0.13 (0.06, 0.20) | 8.82% (3.85%, 13.50%) |
| Nauru | 0.06 (0.03, 0.09) | 8.82% (3.85%, 13.50%) |
| Niue | 0.03 (0.01, 0.05) | 9.26% (3.73%, 14.47%) |
| Tokelau | 0.02 (0.01, 0.02) | 8.80% (3.85%, 13.46%) |

**Figure S1** **Selection of the lifetime risk study sample with index age 50 years**


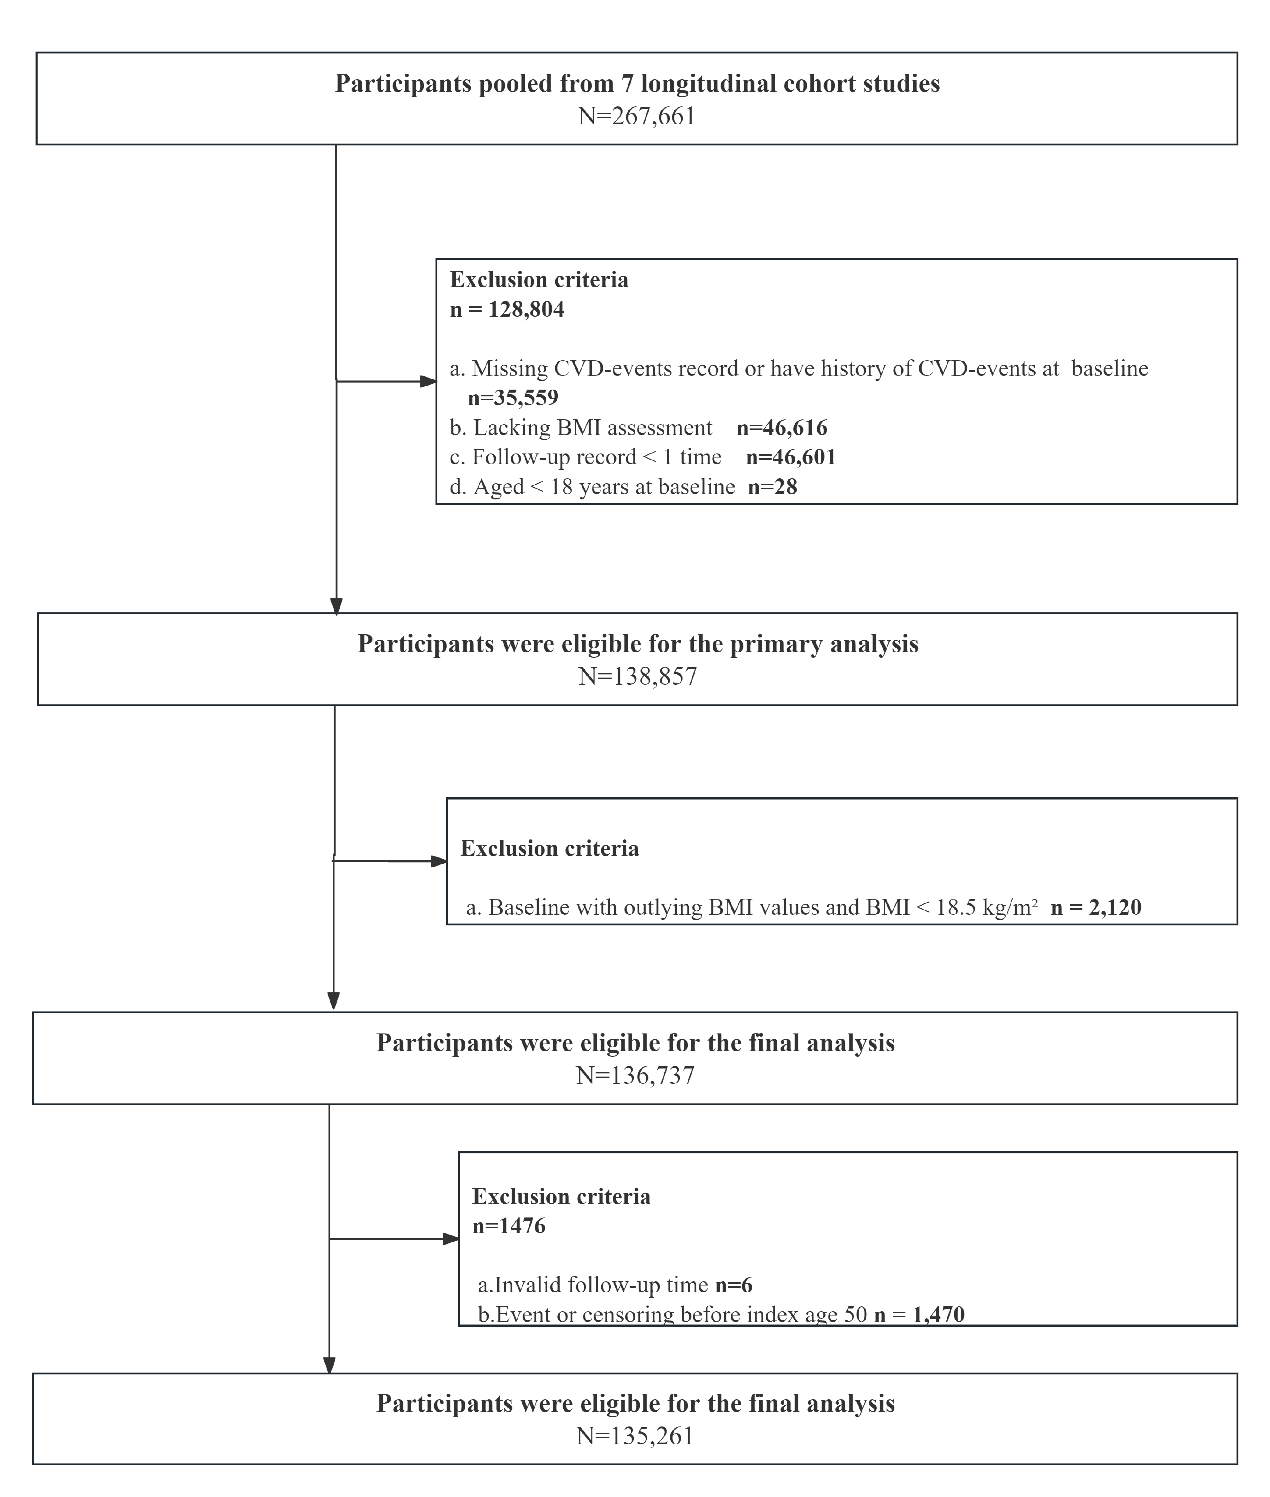


**Figure S2 Selection of the semaglutide-eligible subgroup at index age 50 years**

Weight-related comorbidities were defined as hypertension, type 2 diabetes, or dyslipidaemia. Participants with all three comorbidity indicators missing were excluded.


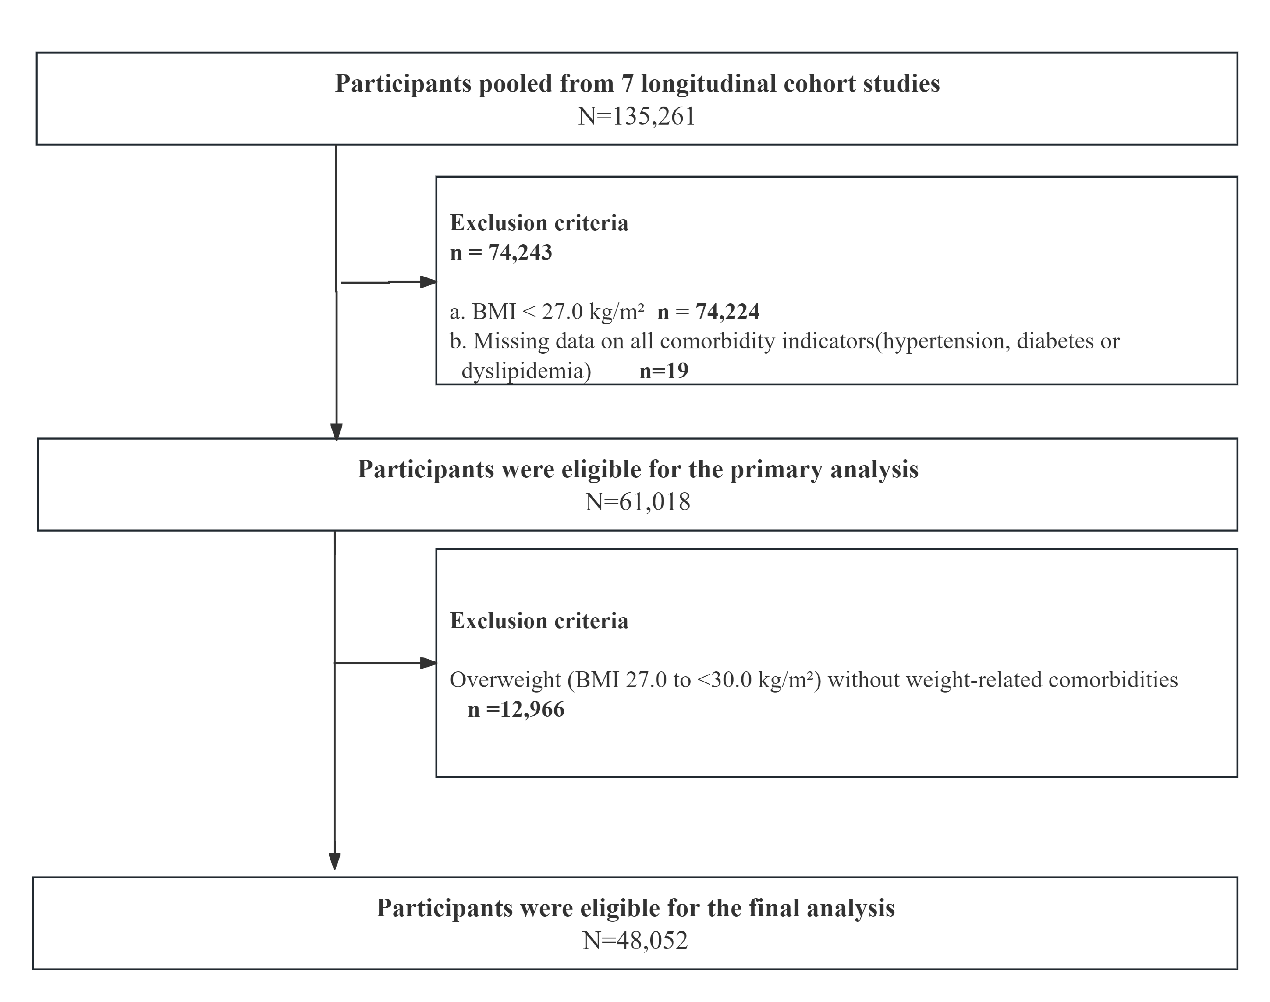


**Figure S3 Selection for the National-Level Analysis**


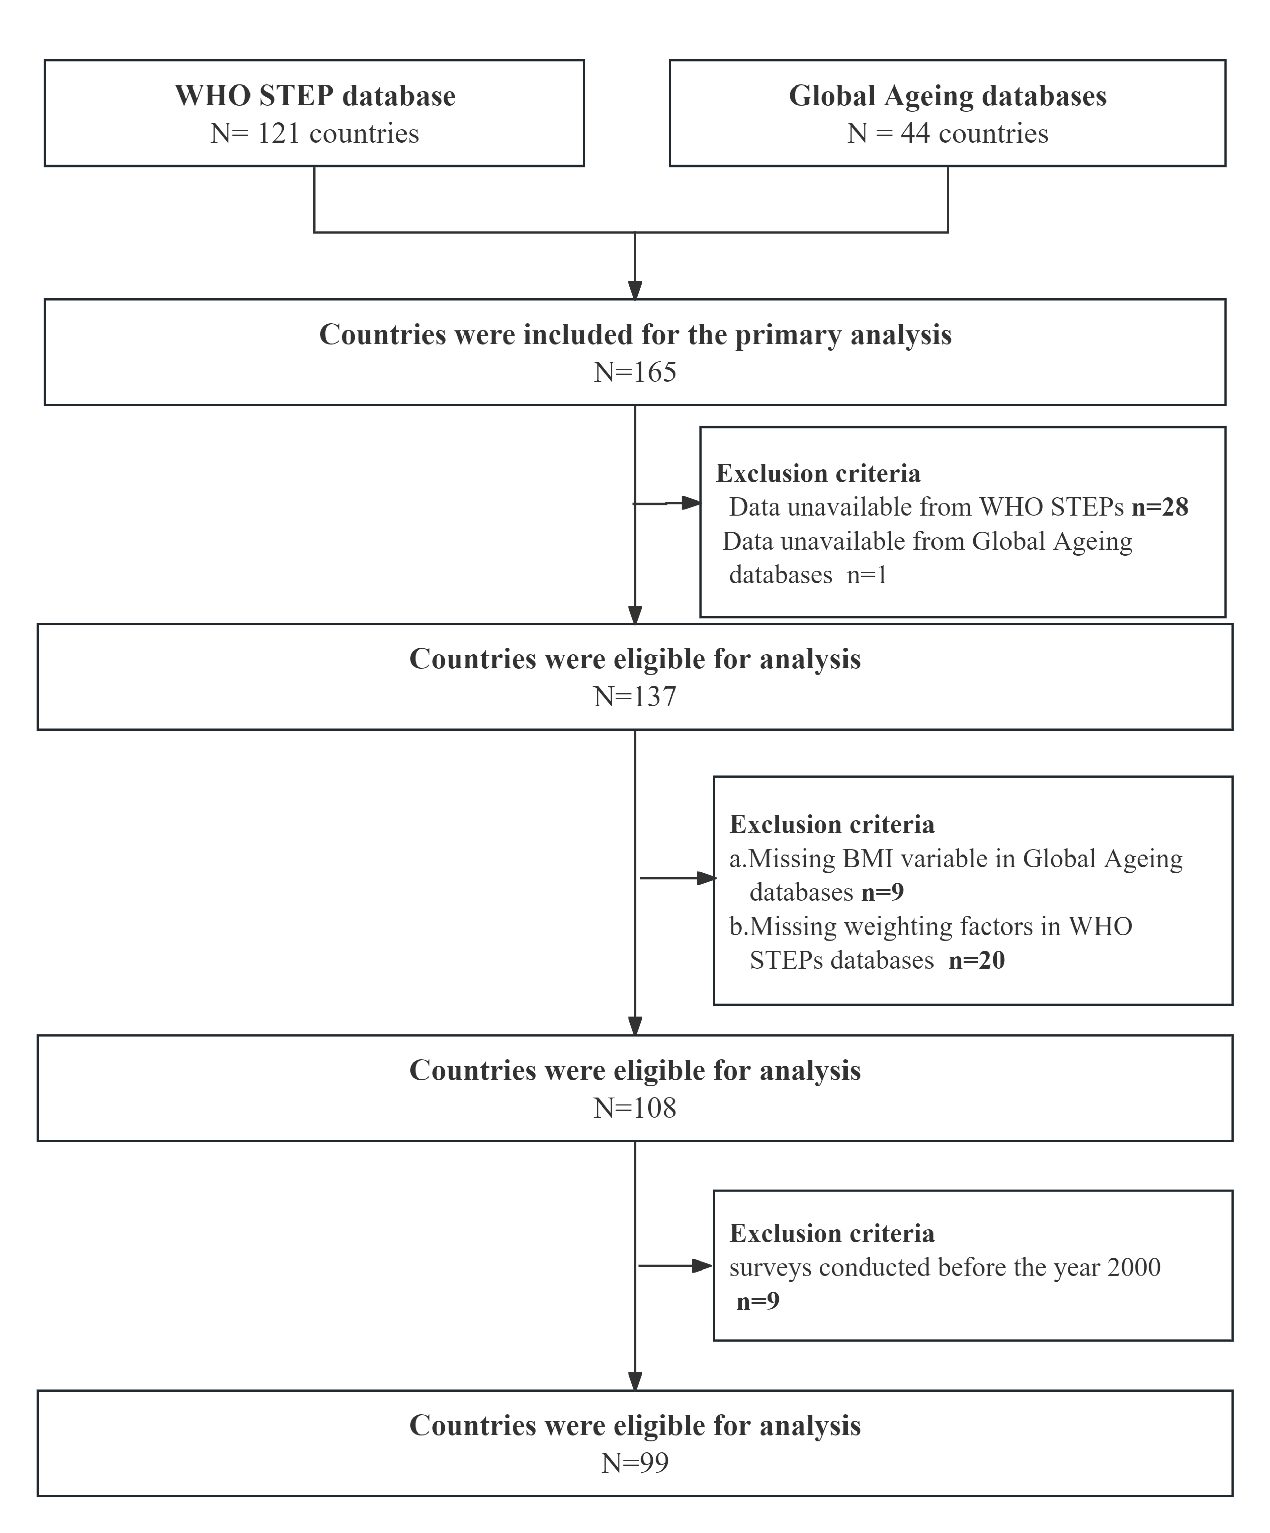


**Figure S4 Selection of Participants for the Nationally Representative Analyses and Eligibility for Semaglutide Treatment, index age ≥50 years**


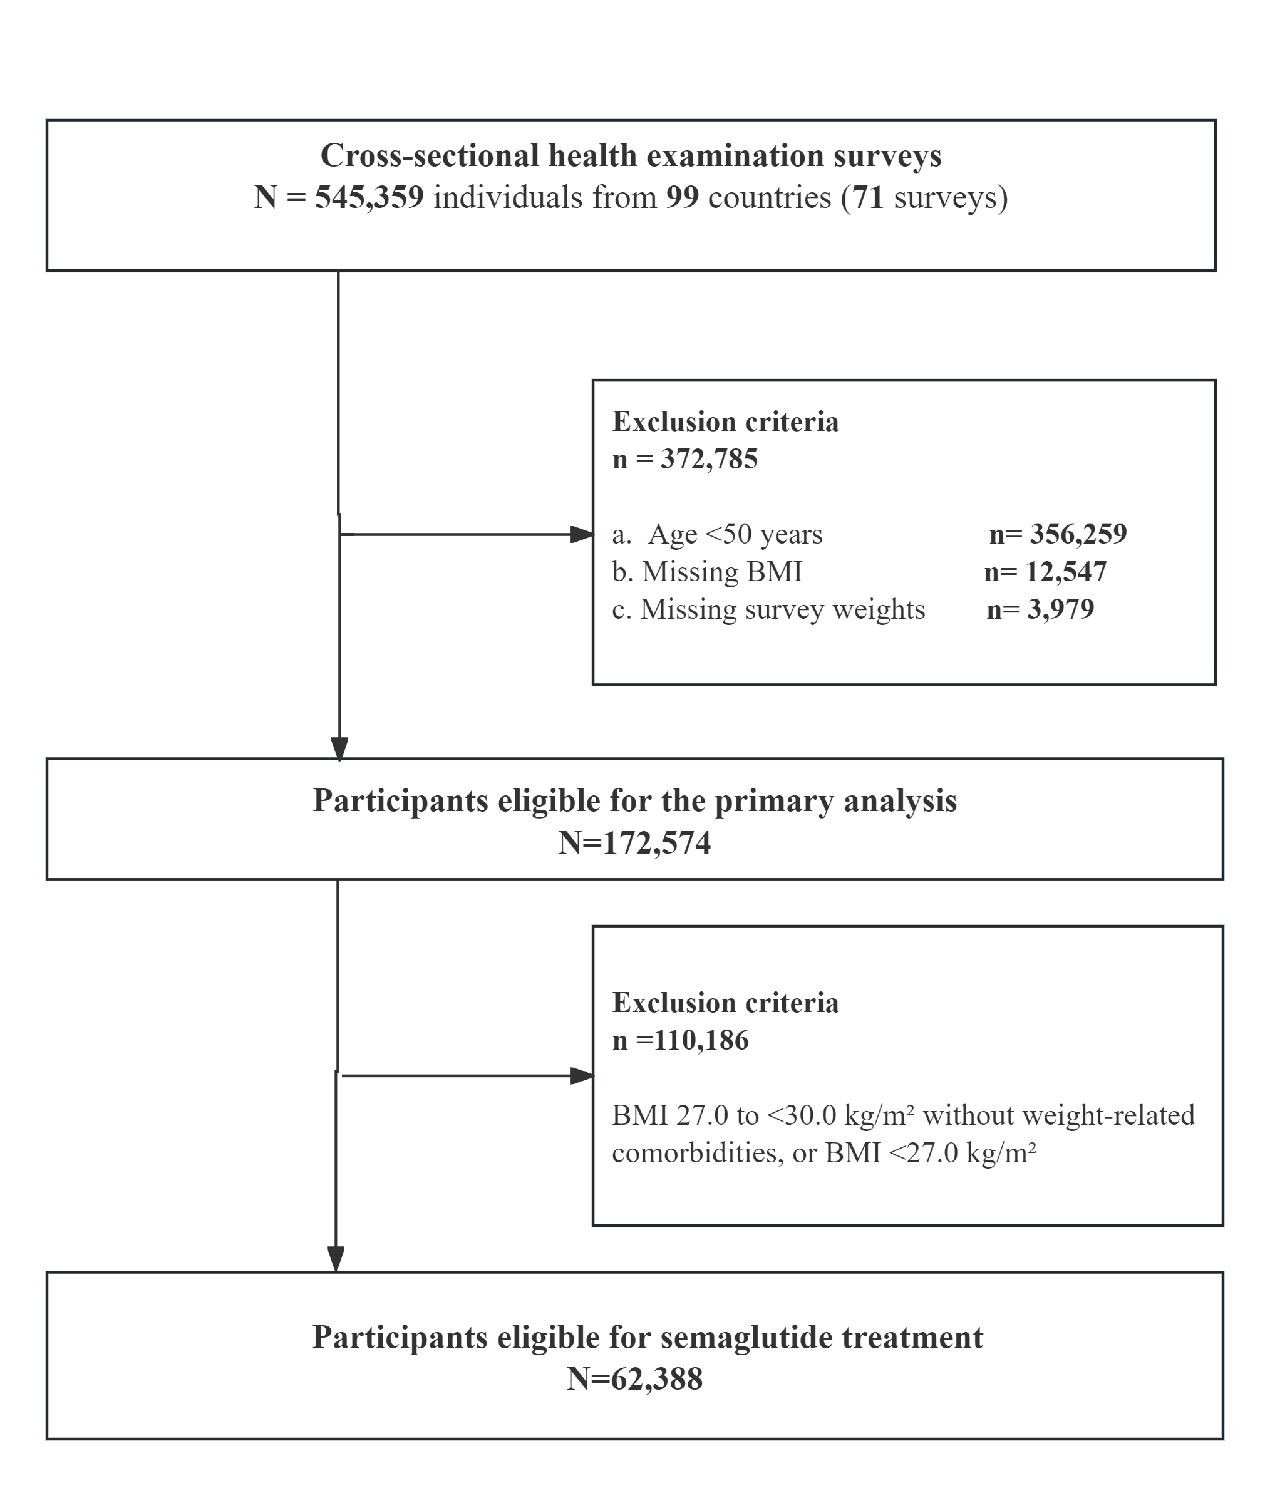


**Figure S5 Estimated RMST Benefit Under Different Scenarios of Patient Compliance**

The forest plot illustrates the results of a probabilistic sensitivity analysis designed to quantify the impact of varying levels of uncertainty in patient compliance on the estimated treatment benefit, measured as the Restricted Mean Survival Time (RMST) benefit in years. Each horizontal line represents a distinct, predefined scenario of compliance uncertainty. The scenarios range from a narrow, high-compliance assumption ("Very High, 80-90%") to a very broad assumption ("Wide Range, 10-90%"). The light-blue diamond on each line represents the median RMST benefit derived from 5,000 Monte Carlo simulations for that specific scenario. It serves as the most likely point estimate of survival gain. The navy-blue horizontal bars represent the 95% confidence interval (CI) of the RMST benefit, defined by the 2.5th and 97.5th percentiles of the simulation outcomes. The width of the error bar is a direct visual measure of the degree of uncertainty in the estimated benefit; a wider bar indicates greater uncertainty resulting from a wider assumed range of patient compliance. The values accompanying each point are presented in the format: Median (95% CI Lower Bound, 95% CI Upper Bound). The dashed line at an RMST benefit of 0.0 years serves as the reference for no difference between the treatment and control arms. As all confidence intervals lie to the right of this line, the treatment benefit remains statistically significant across all tested compliance scenarios.


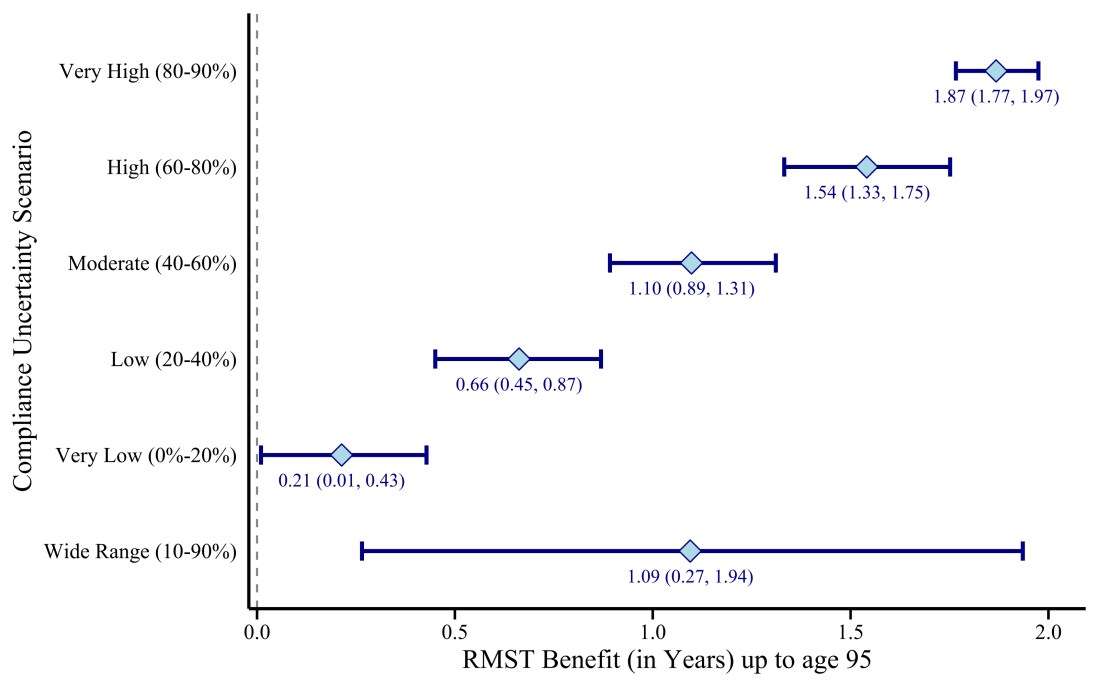


**Figure S6 Projected event-free survival gain for CVD by yearly change in efficacy of semaglutide treatment**

Average survival gain from 50 to 95 years of age. The vertical dashed line perpendicular to the X-axis corresponds to a hazard ratio (HR) of 0.8. On the left of this line, the efficacy of treatment shows a progressive improvement, whereas on the right the therapeutic benefit exhibits an annual decline. We modelled the variation of the treatment effect within the range of -10% to +10%. We applied the inverse of the upper and lower bounds of the effect of the SELECT trial (0.8, 0.72-0.90) to estimate the uncertainty around these survival gains.


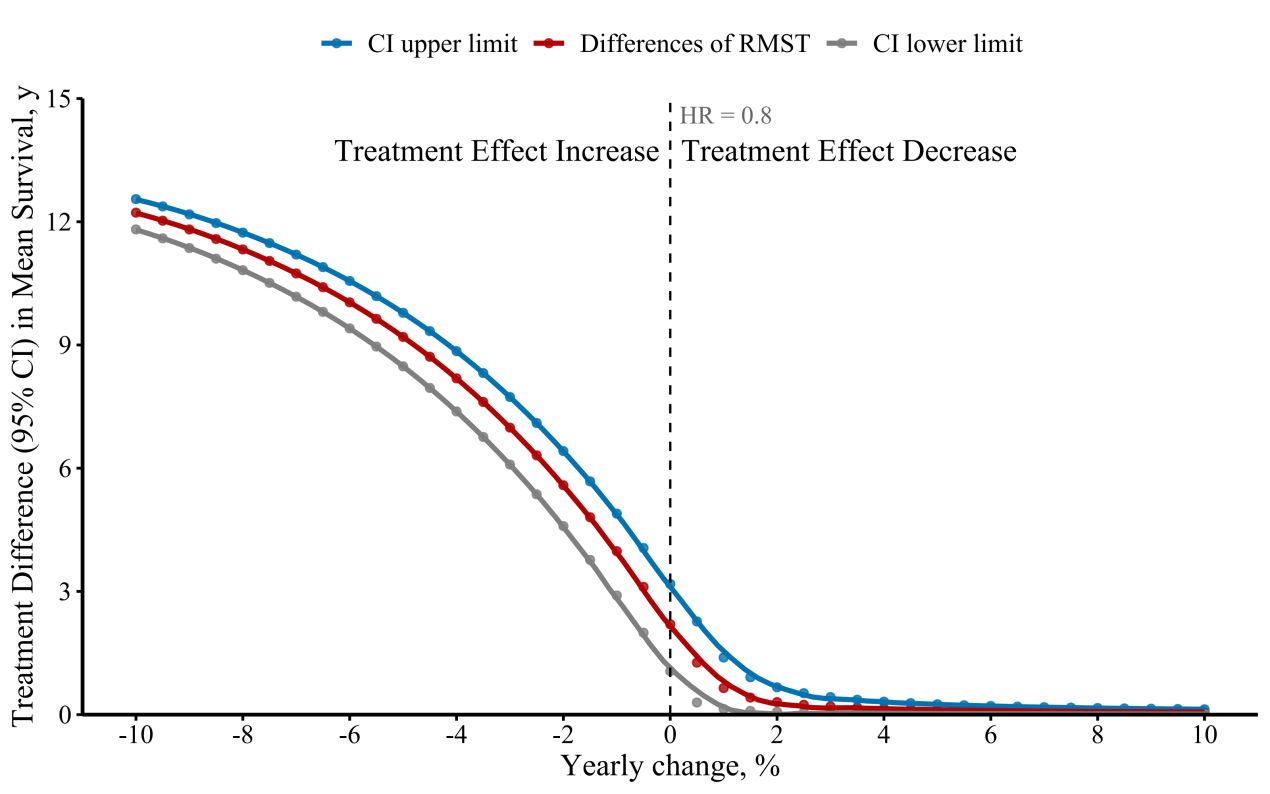


**Figure S7 Patient Compliance Amplifies the Impact of Treatment Effect Durability on Survival Benefit**

This figure illustrates the simulated Restricted Mean Survival Time (RMST) benefit under dual uncertainty. Each panel represents a different target patient compliance level. Each semi-transparent steel-blue point is the outcome of a single Monte Carlo simulation. The solid red line shows the mean trend, estimated via a generalized additive model (GAM). Initial Hazard Ratio (HR) was 0.8. The annual effect multiplier was sampled from U (0.90, 1.10) and the HR was capped at 1.0. Compliance for each simulation was sampled from a Beta distribution centered on the panel's target level.


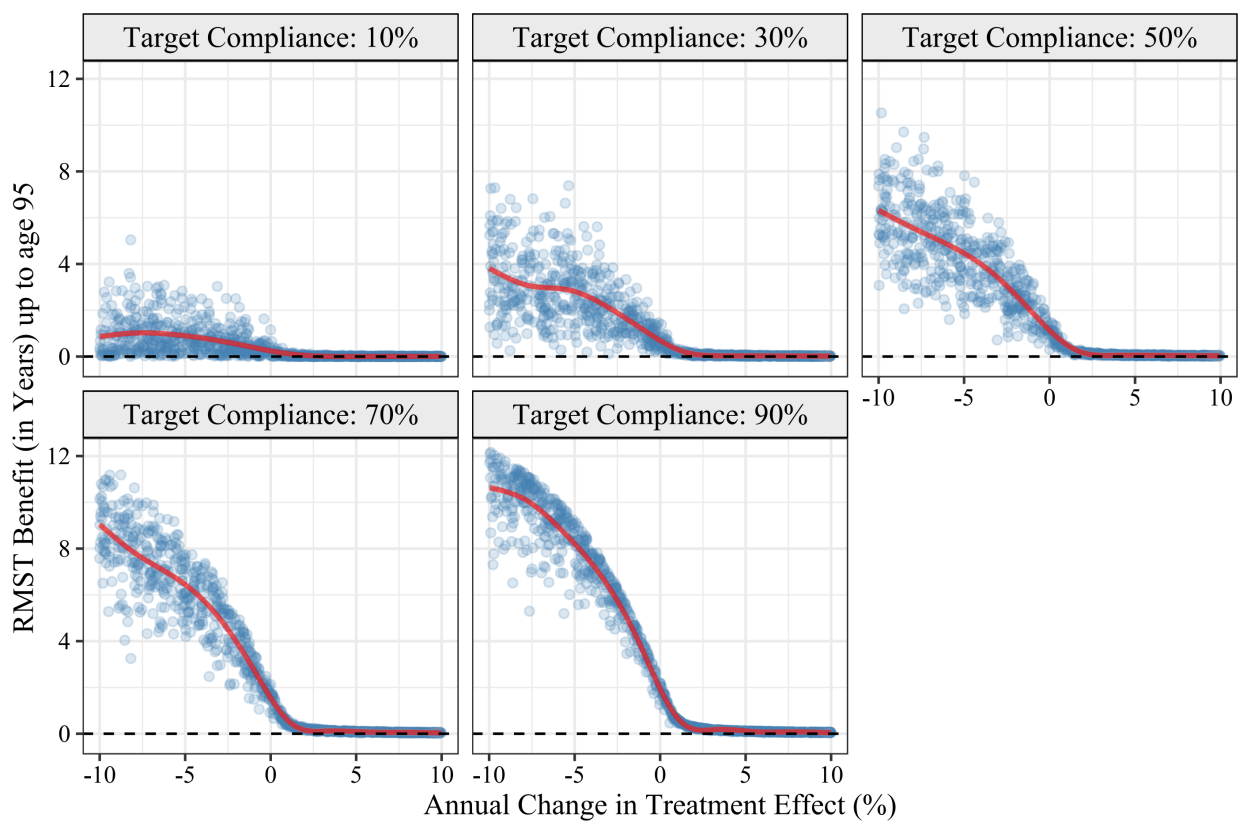


**Appendix Reference:**

1. Beiser A, D’Agostino RB, Seshadri S, Sullivan LM, Wolf PA. Computing estimates of incidence, including lifetime risk: Alzheimer’s disease in the framingham study. The practical incidence estimators (PIE) macro. *Stat Med*. 2000;19(11-12):1495-1522. doi:10.1002/(SICI)1097-0258(20000615/30)19:11/12%3C1495::AID-SIM441%3E3.0.CO;2-E

2. Kaplan EL, Meier P. Nonparametric Estimation from Incomplete Observations. *Springer Ser Statist*. Published online 1992:319-337. doi:10.1007/978-1-4612-4380-9_25

3. Claggett B, Packer M, McMurray JJV, et al. Estimating the Long-Term Treatment Benefits of Sacubitril–Valsartan. *JAMA Cardiol*. 2024;80(Supplement_2):45. doi:10.1056/NEJMc1509753

4. Neuen BL, Heerspink HJL, Vart P, et al. Estimated lifetime cardiovascular, kidney, and mortality benefits of combination treatment with SGLT2 inhibitors, GLP-1 receptor agonists, and nonsteroidal MRA compared with conventional care in patients with type 2 diabetes and albuminuria. *Circulation*. 2024;149(6):450-462. doi:10.1161/CIRCULATIONAHA.123.067584
